1 **Altered brain activity and functional connectivity after MDMA-assisted therapy for post-**  
2 **traumatic stress disorder**

3  
4 S. Parker Singleton<sup>1</sup>, Julie B. Wang, M.P.H, Ph.D.<sup>2</sup>, Michael Mithoefer, M.D. <sup>2,3</sup>, Colleen  
5 Hanlon, Ph.D.<sup>4</sup>, Mark S. George, M.D.<sup>3,5</sup>, Annie Mithoefer<sup>2</sup>, Oliver Mithoefer, M.D.<sup>3</sup>, Allison R.  
6 Coker, Ph.D. <sup>2,6</sup>, Berra Yazar-Klosinski, Ph.D.<sup>7</sup>, Amy Emerson <sup>2</sup>, Rick Doblin, Ph.D.<sup>7</sup>, Amy  
7 Kuceyeski, Ph.D.<sup>1,8</sup>

8  
9 <sup>1</sup> Department of Computational Biology, Cornell University, Ithaca, NY 14850, USA

10 <sup>2</sup>MAPS Public Benefit Corporations, San Jose, CA 95117, USA.

11 <sup>3</sup>Department of Psychiatry and Behavioral Sciences, Medical University of South Carolina,  
12 Charleston, SC 29425-0742, USA.

13 <sup>4</sup>Wake Forest School of Medicine, Winston-Salem, NC 27101 USA

14 <sup>5</sup> Ralph H. Johnson VA Medical Center, Charleston, SC 29425 USA

15 <sup>6</sup> Department of Neurology, University of California, San Francisco, San Francisco, CA, USA

16 <sup>7</sup> Multidisciplinary Association for Psychedelic Studies, San Jose, CA 95117, USA.

17 <sup>8</sup> Department of Radiology, Weill Cornell Medicine, New York, New York 10021, USA

18

19 **Corresponding Author:** S. Parker Singleton; Email: [sps253@cornell.edu](mailto:sps253@cornell.edu)

20

21 For submission as an Original Article to the *Frontiers in Psychiatry*

22 Total word count = <10,000 words

23 **Role of Funding Sources:** The clinical trial was sponsored by the Multidisciplinary Association  
24 for Psychedelic Studies (MAPS), a 501(c)(3) nonprofit organization. MAPS provided the  
25 MDMA and fully funded this study from private and foundation donations. MAPS Public  
26 Benefit Corporation (MAPS PBC), wholly owned by MAPS, was the trial organizer.

27 **Contributors:** SPS and AK had full access to all the data in the study and take responsibility for  
28 the integrity of the data and for the accuracy of the data analysis. BYK, AE, MM, RD conceived  
29 and designed the clinical trial part of the study. MM & AM carried out experimental treatments  
30 and recorded participant scripts. AE carried out sponsor oversight of data collection. CH and  
31 MSG designed the imaging tasks and acquisition. CH, MSG, and OM oversaw the scanning and  
32 data collection. SPS, AK, JW, AC drafted the paper. SPS carried out preprocessing, analysis, and  
33 interpretation of data. RD obtained funding for the study. All authors contributed to the critical  
34 review and final version of the manuscript.

35 **Conflict of Interest:** MM was paid as a contractor by MAPS PBC. AE, CP, AC, and JW  
36 received salary support for full-time employment with MAPS PBC. BYK and RD received  
37 salary support for full-time employment with MAPS. MM is on the Clinical Advisory Board of  
38 Awakn Life Sciences.

39 **Acknowledgements:** The authors would like to thank the candidates who were willing to be  
40 screened for eligibility; the participants in the trial who contributed their data; S. Sadler for her  
41 dedication as the Study Coordinator; S. Braswell for serving as night attendant, M. Wagner and  
42 J. Wymer for Independent Rater assessments. The authors would also like to thank: J. Holland  
43 who supported this trial as a Medical Monitor; L. Jerome for her numerous and varied  
44 contributions to this Clinical Development Program since prior to its inception with global  
45 systematic literature reviews and medical coding; C. Hennigan for data management; R.

46 Matthews and B. Shechet for clinical operations and monitoring; J. Sonstroem and A. Seltzer for  
47 randomization support and system programming; E. Sola, Y. Gelfand, and B. Cohen for  
48 conducting adherence ratings to facilitate standardization of therapy; I. Gorman for development  
49 of adherence ratings; A. Wilens for supporting video recording. The authors would like to thank  
50 Dr. Edmund Higgins for catalyzing the first discussions about acquiring imaging data in the  
51 MAPS trial.

52

53

54  
55  
56  
57  
58  
59  
60  
61  
62  
63  
64  
65  
66  
67  
68  
69  
70  
71  
72  
73  
74  
75

## ABSTRACT

3,4-methylenedioxymethamphetamine-assisted therapy (MDMA-AT) for post-traumatic stress disorder (PTSD) has demonstrated promise in multiple clinical trials. MDMA is hypothesized to facilitate the therapeutic process, in part, by decreasing fear response during fear memory processing while increasing extinction learning. The acute administration of MDMA in healthy controls modifies recruitment of brain regions involved in the hyperactive fear response in PTSD such as the amygdala, hippocampus, and insula. However, to date there have been no neuroimaging studies aimed at directly elucidating the neural impact of MDMA-AT in PTSD patients. We analyzed brain activity and connectivity via functional MRI during both rest and autobiographical memory (trauma and neutral) response before and two-months after MDMA-AT in nine veterans and first-responders with chronic PTSD of 6 months or more. We hypothesized that MDMA-AT would increase amygdala-hippocampus resting-state functional connectivity, however we only found evidence of a trend in the left amygdala – left hippocampus ( $t = -2.91$ , uncorrected  $p = 0.0225$ , corrected  $p = 0.0901$ ). We also found reduced activation contrast (trauma > neutral) after MDMA-AT in the cuneus. Finally, the amount of recovery from PTSD after MDMA-AT correlated with changes in four functional connections during autobiographical memory recall: the left amygdala – left posterior cingulate cortex (PCC), left amygdala – right PCC, left amygdala – left insula, and left isthmus cingulate – left posterior hippocampus. Amygdala – insular functional connectivity is reliably implicated in PTSD and anxiety, and both regions are impacted by MDMA administration. These findings compliment previous research indicating that amygdala, hippocampus, and insula functional connectivity is a potential target of MDMA-AT, and highlights other regions of interest related to memory

76 processes. More research is necessary to determine if these findings are specific to MDMA-AT  
77 compared to other types of treatment for PTSD.

78

79 This study: NCT02102802 Parent-study: NCT01211405

80

81 Keywords: PTSD, MDMA, amygdala, hippocampus, precuneus, symptom provocation, insula,  
82 fMRI, functional connectivity, resting-state, autobiographical memory.

83

84 **1. INTRODUCTION**

85 Post-traumatic stress disorder (PTSD), which can arise following exposure to a traumatic event  
86 or repeated stressful events and is a debilitating social and economic burden on individuals and  
87 their families (Davidson 2000; Gradus 2017). PTSD is associated with an increased fear response  
88 (VanElzakker, Staples-Bradley, and Shin 2018) and distressing and intrusive re-experiencing of  
89 traumatic memories (Ehlers 2010) that often serves as a barrier to the therapeutic process. This  
90 may explain why individuals with the most severe PTSD symptoms after trauma are more likely  
91 to end up with chronic PTSD durations (Shalev et al. 2019; van der Mei et al. 2020). Lifetime  
92 occurrence of PTSD in the general population is around 8%, and, prevalence is significantly  
93 higher in military personnel (17.1%) and first responders (10-32%), individuals on the front lines  
94 of societal trauma (Hoge et al. 2004; Javidi and Yadollahie 2012). A meta-analysis of trials for  
95 military-related PTSD found that cognitive behavioral therapy and prolonged exposure therapy  
96 delivered clinically meaningful symptom improvements in 49-70% of patients, however 60-72%  
97 of veterans receiving these therapies still retained their PTSD diagnosis (Steenkamp et al. 2015).  
98 Adverse outcomes such as increased symptoms and disengagement from treatment cause many  
99 current psychological therapies for PTSD to have high dropout rates (Goetter et al. 2015),  
100 especially trauma focused therapies (Lewis et al. 2020; Mott et al. 2014).

101

102 One approach to developing more effective psychotherapies for PTSD is to administer a drug  
103 alongside psychotherapy to aid the therapeutic process (Feduccia et al. 2018). 3,4-  
104 methylenedioxymethamphetamine-assisted therapy (MDMA-AT) is hypothesized to reduce the  
105 fear response associated with re-experiencing traumatic memories, and therefore may facilitate  
106 tolerable processing of traumatic content in patients with PTSD (Mithoefer et al. 2011). Phase 2

107 and 3 trials have demonstrated promise for MDMA-AT as a viable treatment for PTSD (Mitchell  
108 et al. 2021; Mithoefer et al. 2019; Wang et al. 2021; Jerome et al. 2020). MDMA, particularly  
109 the *R*-enantiomer, increases pro-social behavior and enhances fear extinction in mice and this  
110 effect appears to be mediated by serotonergic mechanisms (Curry et al. 2018; M. B. Young et al.  
111 2017). In healthy humans, acute administration of MDMA has been shown to enhance positive  
112 and reduce negative affect during the recollection of autobiographical memories, while  
113 preserving vividness and emotional intensity (Carhart-Harris et al. 2014). In another study,  
114 MDMA was found to preserve the memory accuracy when administered during both encoding  
115 and retrieval phases, while attenuating the recollection of salient details for both positive and  
116 negative memories, suggesting that MDMA alters emotional memory representations (Doss et al.  
117 2018). Again in healthy controls, MDMA was found to enhance fear extinction  
118 learning/retention rates compared to placebo when administered during extinction training  
119 phases (Vizeli et al. 2022; Maples-Keller et al. 2022). These findings suggest that MDMA may  
120 aid the therapeutic process, in part, by enabling patient access to emotionally challenging  
121 material and facilitating memory reconsolidation/fear extinction processes (Feduccia and  
122 Mithoefer 2018).

123

124 Functional magnetic resonance imaging (fMRI) measures changes in regional blood oxygenation  
125 over time and is thus used as a proxy for fluctuating neuronal activity. In-scanner environments  
126 can be absent of stimuli (resting-state fMRI – thought to measure intrinsic brain activity), or  
127 tasks or stimuli may be presented to study the regional brain dynamics underlying specific  
128 cognitive processes (Glover 2011). In addition to the study of isolated regional activation  
129 changes, functional connectivity (FC) can be assessed to infer interaction between two or more

130 brain regions. FC is defined as the statistical relationship (Pearson correlation in the case of the  
131 present study) between two brain regions' activity over time. These tools have been used to study  
132 functioning of brain regions and their networks in a wide range of neuropathology and  
133 psychiatric disorders (Zhou et al. 2017; Lucassen et al. 2014; Woodward and Cascio 2015).  
134 PTSD patients have shown altered functioning of the precuneus, posterior cingulate cortex  
135 (PCC), anterior cingulate cortex (ACC), insula, prefrontal and frontoparietal regions, as well as  
136 the hippocampus and amygdala (Sartory et al. 2013; Harnett, Goodman, and Knight 2020;  
137 Abdallah et al. 2017; Lazarov et al. 2017; Malivoire et al. 2018; Brown et al. 2014; Pitman et al.  
138 2012; Gilboa et al. 2004; Fonzo et al. 2021; Rabinak et al. 2011; Belleau et al. 2020; Thome et  
139 al. 2020; R. A. Lanius et al. 2006; Sripada et al. 2012), suggesting augmented recruitment of  
140 brain regions involved in self-referential processing (Cavanna and Trimble 2006), salient  
141 autobiographical memory (Svoboda, McKinnon, and Levine 2006; Spreng, Mar, and Kim 2009;  
142 Sestieri et al. 2011; Maddock 1999; Spreng and Grady 2010), and fear and emotion (LeDoux  
143 2003).

144

145 The specific effects of MDMA-AT on brain function in individuals with PTSD have not been  
146 characterized, but several studies suggest the amygdala and hippocampus may play an important  
147 role. The amygdala is broadly associated with fear response, and the hippocampus, associated  
148 with learning and memory, may provide contextual information necessary for cognitive-affect  
149 during memory recall (LeDoux 2003; Harnett, Goodman, and Knight 2020; Pitman et al. 2012).  
150 Sripada and colleagues (2012) found combat veterans with PTSD have decreased amygdala-  
151 hippocampal resting-state functional connectivity (RSFC) compared to combat veterans without  
152 PTSD, which the authors speculate may represent an inability to contextualize affective



153 information in PTSD. Increased amygdala-hippocampal RSFC following stress/trauma exposure  
154 has been shown to correlate with recovery from stress or trauma symptoms (Ben-Zion, Keynan,  
155 et al. 2020; Vaisvaser et al. 2013; Fan et al. 2015), suggesting a possible adaptive mechanism to  
156 threat exposure. In healthy volunteers, the acute administration of MDMA increases amygdala-  
157 hippocampal RSFC (Carhart-Harris, 2015). Intranasal oxytocin also increases amygdala-  
158 hippocampal RSFC (Fan et al. 2015), and this effect appears to be mediated by serotonin system  
159 signaling (Lan et al. 2022) – two neuromodulators that MDMA significantly increases in the  
160 extracellular/plasma concentration of, and that play a crucial role in its effects on pro-social  
161 behavior and fear extinction (Dumont et al. 2009; Feduccia and Duvauchelle 2008; de la Torre et  
162 al. 2004; Green et al. 2003; Thompson et al. 2007; Nardou et al. 2019; Young et al. 2017).  
163 Despite evidence that RSFC between the amygdala and hippocampus is implicated in PTSD and  
164 that this connection may be modulated by MDMA, no study to date has shown relationships  
165 between changes in these regions' functional connectivity and the therapeutic effects of MDMA-  
166 AT.

167

168 Herein, we describe results from a study of combat veterans and first-responders undergoing  
169 MDMA-AT for PTSD in a randomized, double-blind, dose-response phase 2 clinical trial  
170 (Mithoefer et al. 2018). The Clinician-Administered PTSD Scale (CAPS-IV) (an hour-long,  
171 semi-structured interview centered around an index trauma) (Blake et al. 1990) was assessed  
172 throughout the study to track PTSD severity. Enrolled individuals had moderate-to-severe PTSD  
173 with a chronic PTSD duration of 6 months or more. Both resting-state and task-fMRI data,  
174 acquired while individuals listened to trauma-related and neutral audio scripts, were collected

175 before and two months after MDMA-AT (follow-up scans were collected after the blind was  
176 broken).

177

178 Prior to analysis, we hypothesized that MDMA-AT would increase RSFC between the amygdala  
179 and hippocampus (Sripada et al. 2012; Carhart-Harris et al. 2015; Ben-Zion, Zeevi, et al. 2020;  
180 Vaisvaser et al. 2013; Fan et al. 2015; Lan et al. 2022). We further hypothesized that, at baseline,  
181 brain activity would be higher during the trauma-related listening task compared with the neutral  
182 listening task in regions associated with autobiographical memory, fear, and emotion, and that  
183 this effect would be reduced post-treatment (Sartory et al. 2013). In a final set of analyses, we  
184 assessed pre-to-post treatment change in the FC of several regions of interest contained within  
185 the limbic, salience, and default mode networks known to be hyperactive in PTSD (Etkin and  
186 Wager 2007) during the trauma and neutral autobiographical memory task-fMRI scans. FC  
187 changes were then correlated with the pre-to-post treatment recovery in overall PTSD  
188 symptomatology – as measured by decreases in CAPS-IV total severity scores.

189

190 **2. METHODS**

## MDMA-AT Neural Response

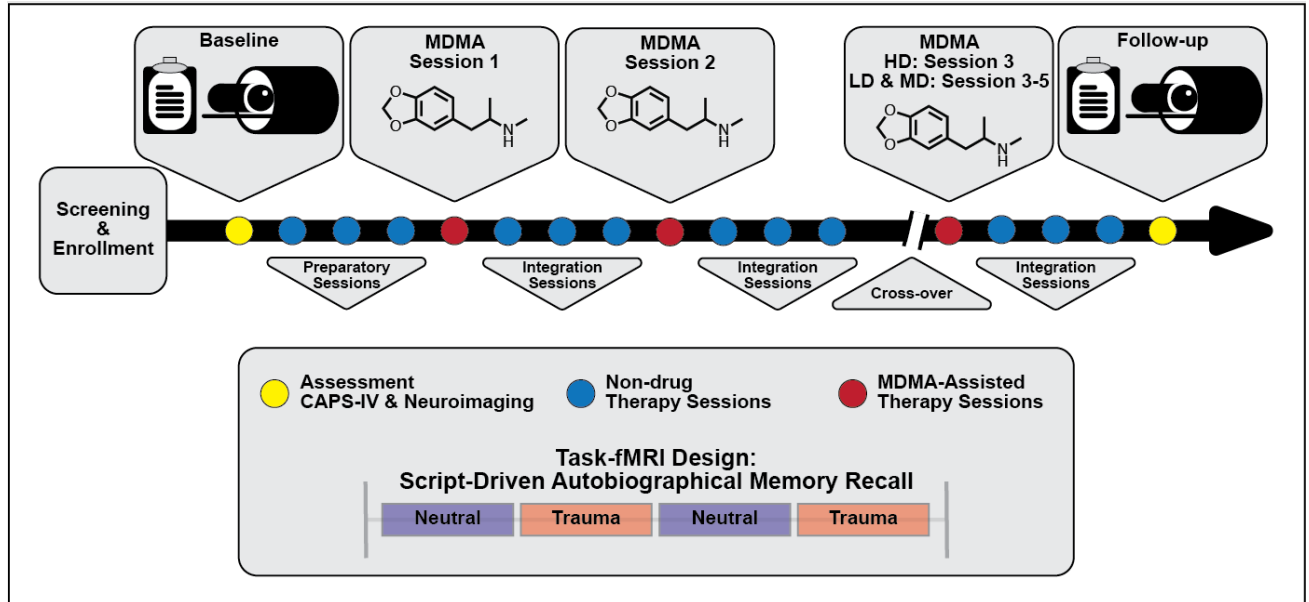

191  
192 Figure 1: Simplified study design. Subjects were assessed and imaged at the start of the study  
193 (baseline). All subjects (low dose (LD; 30 mg MDMA), medium dose (MD; 75 mg  
194 MDMA), and high dose (HD; 125 mg MDMA)) underwent three non-drug preparatory  
195 therapy sessions prior to their first MDMA dosing session. Each MDMA session was  
196 followed by three non-drug integration therapy sessions. After MDMA Session 2 and the  
197 subsequent integration sessions, subjects were assessed and the dosing blind was broken. HD  
198 subjects completed their final set of drug and non-drug therapy sessions unblinded, and  
199 LD/MD subjects crossed over into the HD arm where they completed three sets of drug and  
200 non-drug sessions, now with the higher dose and unblinded. All subjects were assessed and  
201 underwent MRI approximately two months following their last HD MDMA session. See the  
202 Methods section for a full description of study design and scanning protocols.

203

### 204 2.1 Trial design

205 The present study analyzed data from a sub-study (NCT02102802) of a Phase 2 randomized,  
206 double-blind, dose-response trial of MDMA-AT in veterans and first responders with severe and  
207 chronic PTSD (NCT01211405) (Mithoefer et al. 2018). A detailed study description of the  
208 parent study can be found in (Mithoefer et al. 2018), and we summarize the study design in the  
209 SI. Here, we provide a description of the MRI-based sub-study design.

210 Participants in the parent study were able to opt into the MRI-based sub-study after which they  
211 provided written informed consent approved by the Medical University of South Carolina  
212 Institutional Review Board. They were screened for additional neuroimaging related eligibility  
213 criteria and were excluded for any conditions that could render MRI unsafe. A script-driven  
214 autobiographical memory paradigm was used to assess brain activity during symptom  
215 provocation (Ruth A Lanius et al. 2002; Ruth A. Lanius et al. 2004; Mertens et al. 2022).

216 Following baseline CAPS-IV assessment in the parent study, sub-study participants worked with  
217 investigators to create two scripts: one describing a personally traumatic event and one reflecting  
218 their typical morning routine at home. Two audio recordings, each six minutes in length, were  
219 created from the participant's reading of each script. Each audio recording was divided into two  
220 3-minute blocks for the task-fMRI. All participants, in all arms, were imaged at baseline, prior to  
221 therapy, and again at the follow-up visit two months after their final dosing session. LD (N = 2)  
222 and MD (N = 2) participants were additionally imaged after the primary endpoint visit in Stage 1  
223 (one month following their second dosing session), however the small sample sizes prevented  
224 any meaningful analysis with these scans. The present analysis focuses on the pre- and post-  
225 therapy effects of MDMA-AT on fMRI biomarkers, and thus uses the scans collected at pre-  
226 treatment (baseline) and at least 2 months after the largest dose of MDMA (follow-up).

227

## 228 **2.2 MRI acquisition**

229 At each scanning session, participants underwent MRI on a 32 channel 3T Siemens system. T1  
230 anatomical scans with TR/TE=1900/2.34 ms and 0.9x0.9x1.0 mm voxel size were collected,  
231 followed by two identical task fMRI (design described below) (TR/TE = 2200/35ms, 3.0 mm  
232 isotropic voxel size, length of each scan = 14:25 min) and one resting state fMRI (TR/TE =  
233 2000/30ms, 3.3x3.3x3.0 mm voxel size, length = 5:00 min).  
234 Participants' 6-minute trauma and neutral audio scripts were divided into two three-minute  
235 trauma and neutral blocks each (See 2.1 Trial design for description of audio recordings). During  
236 fMRI, participants were presented with the visual cue "allow" and instructed to allow themselves  
237 to experience the scripts as their audio recordings were played for both neutral and trauma  
238 blocks. Each task scan had an alternating block design (neutral 1, trauma 1, neutral 2, trauma 2)  
239 with an 18 second 'rest' period at the start of the scan and between each block, and about a  
240 minute of rest at the end of the scan. The precise length of each audio block was 2.95 min.

241

## 242 **2.3 Image preprocessing**

243 FreeSurfer (Dale, Fischl, and Sereno 1999) was applied to the T1s to create white matter (WM),  
244 gray matter (GM) and cerebrospinal fluid (CSF) segmentations. FMRIB Software Library (FSL)  
245 (Smith et al. 2004) was used for 1) brain extraction, 2) registration between T1s and fMRI's  
246 (brain-boundary registration, non-linear, full-search), 3) high-pass filtering 4) slice-time and 5)  
247 motion correction.

248

## 249 **2.4 Motion**

250 High-motion frames (defined as  $> 0.9$  mm relative framewise displacement (FD); CONN  
251 Toolbox standard parameter (Whitfield-Gabrieli and Nieto-Castanon 2012) ) were counted as  
252 outlier volumes and scrubbed from functional connectivity and activation analyses. The  
253 percentage of scrubbed volumes for resting-state scans ranged from 0 to 6.8% (mean = 2.1%) of  
254 total volumes. The percentage of scrubbed volumes for task scans ranged from 0 to 11% (mean =  
255 1.7%) of total volumes. The mean composite FD (Power et al. 2012) for each condition (rest and  
256 task) was calculated and compared across time-points using two-sided, paired t-tests. Mean FD  
257 during resting-state fMRI scans at baseline and follow-up were  $0.12(\pm 0.06$  s.d.) mm and  $0.12(\pm$   
258  $0.07$  s.d.) mm, respectively, and were not significantly different from one another ( $t$ -statistic = -  
259  $0.02$ ;  $p = 0.99$ ). Mean FD during task fMRI scans at baseline and follow-up were  $0.22(\pm 0.16$   
260 s.d.) mm and  $0.17(\pm 0.09$  s.d.) mm, respectively, and were not significantly different from one  
261 another ( $t$ -statistic =  $1.23$ ,  $p = 0.25$ ).

262

## 263 **2.5 Activation analysis: brain response to trauma versus neutral audio listening**

264 FSL's fMRI Expert Analysis Tool (FEAT) (Woolrich et al. 2004) was used for fitting a general  
265 linear model (GLM) to the voxelwise timeseries for each task scan after spatial smoothing using  
266 a Gaussian kernel function (6 mm full width at half maximum (FWHM)). For 1<sup>st</sup>- level analysis,  
267 models were generated for the neutral block, the trauma block, and a contrast of the two (trauma  
268  $>$  neutral). Confound explanatory variables (EVs) included the temporal derivative of each block,  
269 5 nuisance regressors each for WM and CSF signal, outlier volumes (spikes in global signal ( $> 5$   
270 standard deviations) and motion ( $>0.9$  mm FD); CONN Toolbox standard parameters (Whitfield-  
271 Gabrieli and Nieto-Castanon 2012) ), and 24 motion confounds (Friston et al. 1996). Second-  
272 level analysis averaged the models from each of the two task scans performed at each time point.

273 Third-level analyses, using a two-sided, one-sample t-test (FSL randomize; Winkler et al. 2014)  
274 identified group-level response for the contrast model (i) at baseline, and (ii) at the two-month  
275 follow-up. A final third-level analysis (iii) compared the group-level responses to the contrast  
276 model at baseline and follow-up using a two-sample, two-sided, paired t-test (FSL randomize;  
277 Winkler et al. 2014). Third-level results were corrected for multiple comparisons using  
278 threshold-free cluster enhancement (TFCE;  $\alpha = 0.05$ ) (Smith and Nichols 2009) which  
279 identifies significant clusters based on the extent of local support from surrounding voxels.

280

## 281 **2.6 RSFC analysis**

282 Prior to extraction of RSFC, in addition to the preprocessing steps taken in 2.3, fMRI data were  
283 further denoised using an in-house pipeline (<https://github.com/kjamison/fmriclean>). FMRI  
284 were bandpass filtered and regressed for 24 motion confounds (Friston et al. 1996), 5 nuisance  
285 regressors each for WM and CSF, and one for global GM signal. The first five frames (scanner  
286 start-up noise) and confound frames (spikes in global signal and motion) were discarded. RSFC  
287 (Fisher Z-transformed Pearson correlation values) between the right and left amygdala and right  
288 and left hippocampus (Desikan et al. 2006) was calculated for each resting-state scan. For the  
289 supplemental RSFC analysis, each hippocampus was further segmented into head and tail  
290 portions using FreeSurfer's hippocampal subregion segmentation tool (Iglesias et al. 2015).  
291 Two-tailed, paired *t*-tests were used to compare the 4 RSFC measures before and after MDMA-  
292 AT. Baseline to follow-up changes in these 4 measures were also correlated (Pearson's) with  
293 individual level reductions in CAPS-IV using participant's age and mean FD changes (follow-up  
294 – baseline) as covariates of non-interest. All statistical tests were performed at an alpha level of

295 0.05. P-values were corrected for multiple comparisons using the Benjamini-Hochberg algorithm  
296 (Benjamini and Hochberg 1995) where indicated (pFDR).

297

## 298 2.7 Task FC analysis

299 Prior to extraction of task FC, the preprocessed residuals from the task activation analysis (2.5)  
300 were further denoised with bandpass filtering and regressed for global GM signal. The first five  
301 frames (scanner start-up noise) and confound frames (spikes in global signal ( $> 5$  standard  
302 deviations) and motion ( $>0.9$  mm FD); CONN Toolbox standard parameters (Whitfield-Gabrieli  
303 and Nieto-Castanon 2012)) were ignored. Functional connectivity (Fisher Z-transformed Pearson  
304 correlation values) during each task fMRI scan (task FC) was calculated between 18 regions of  
305 interest (ROIs): the right and left hippocampus head, hippocampus tail, amygdala, precuneus,  
306 caudal anterior cingulate cortex (ACC), rostral ACC, posterior cingulate cortex (PCC), isthmus  
307 cingulate, and insula. All ROIs were extracted from the Desikan-Killiany cortical atlas (see SI  
308 Figures 7 and 8 for ROI definitions) (Desikan et al. 2006) , and head and tail portions of the  
309 hippocampus were created using FreeSurfer's hippocampal subregion segmentation tool (Iglesias  
310 et al. 2015). Two identical task scans were collected at each time point, thus FC values obtained  
311 from both scans were averaged to give a single value for each connection per subject. Group-  
312 level changes from pre- to post-therapy in the strength of functional connections were assessed  
313 using two-tailed, paired *t*-tests. Pearson correlations were calculated between individuals'  
314 changes in functional connection strength and change in CAPS-IV total severity scores (follow-  
315 up – baseline) using participant age and mean FD changes between baseline and follow-up as  
316 covariates of non-interest. All statistical tests were performed at an alpha level of 0.05. P-values



317 were corrected for multiple comparisons using the Benjamini-Hochberg algorithm (Benjamini  
318 and Hochberg 1995) where indicated (pFDR).

319

320

### 321 3. RESULTS

#### 322 3.1 CAPS-IV total severity scores significantly decreased after HD MDMA-AT

323 Ten participants enrolled in the sub-study, and one withdrew consent after baseline due to  
324 anxiety in the MRI scanner, leaving nine participants with MRI data at both time points (6 male,  
325 3 female, aged 41.3; standard deviation (SD) =  $\pm 10.9$  years; 8 veterans and 1 first-responder; see  
326 SI Table 1 for additional demographic information). All participants had chronic PTSD (mean  
327 duration = 84 ( $\pm 45$ ) months). One participant's baseline resting-state fMRI was truncated due to  
328 technical issues, leaving eight participants for resting-state analysis and nine for the task fMRI  
329 analysis. One participant began the trial with moderate PTSD (CAPS-IV > 39), while the  
330 remaining eight presented with severe PTSD (CAPS-IV > 59). Mean (SD) CAPS-IV total  
331 severity scores of the nine individuals pre- and post-MDMA-AT were 86 ( $\pm 16$ ) and 39 ( $\pm 25$ ),  
332 respectively, representing a significant decrease in PTSD symptom severity between the two  
333 time points (Figure 2; N=9,  $t = 6.36$ ,  $p = 0.00022$ ). The average percent decrease in CAPS was  
334 57 ( $\pm 26$ )%. Results on all participants enrolled in the Phase 2 parent trial have been previously  
335 reported (Mithoefer et al. 2018).

336

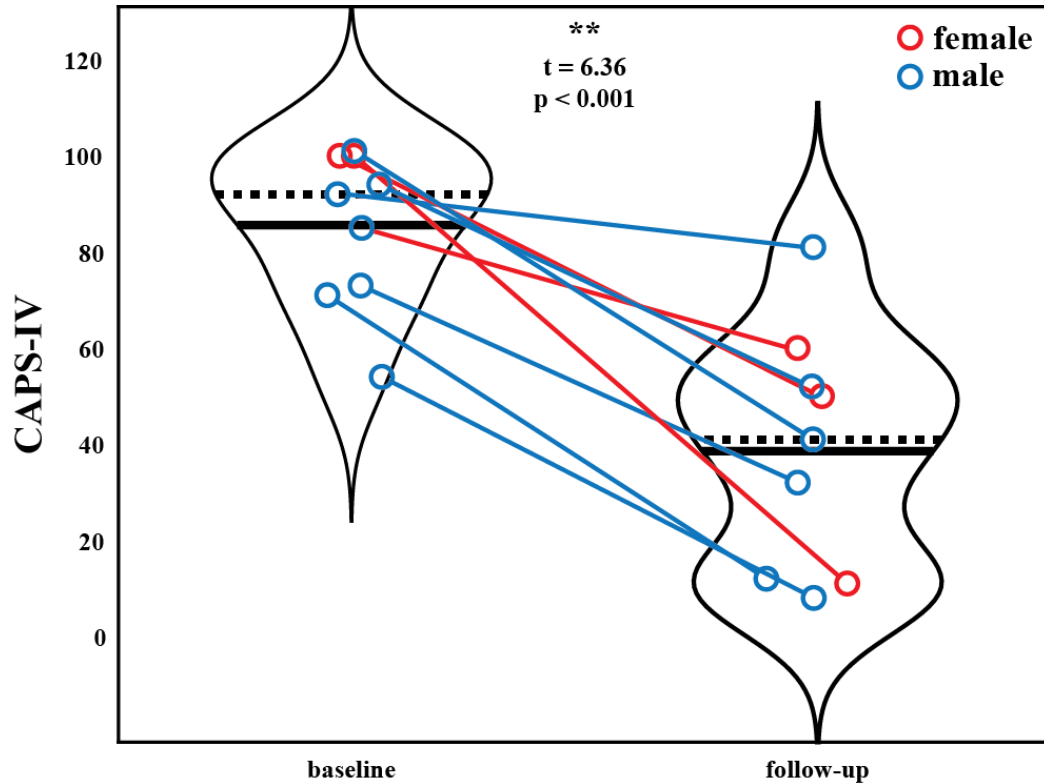

337

338 Figure 2: Patient CAPS-IV total severity scores at the baseline (pre-therapy) and two-month  
339 follow-up (post-therapy) scanning sessions. Black solid and dashed lines indicate group means  
340 and medians, respectively. Blue marker = male. Red marker = female. A significant reduction in  
341 PTSD severity was observed after MDMA-AT (baseline > follow-up; N=9,  $t = 6.36$ ,  $p =$   
342 0.00022).

343

### 344 3.2 Baseline versus two-month follow-up amygdala-hippocampal RSFC

345 The RSFC was assessed between the amygdala and hippocampus before and after MDMA-AT  
346 and the strengths of these connections are illustrated in Figure 3. All connections trended  
347 towards increased RSFC after therapy compared to before therapy (using a two-sided paired t-  
348 test), with left amygdala to left hippocampus having a significant increase prior to (but not after)  
349 corrections for multiple comparisons (N=8,  $t = -2.91$ , uncorrected  $p = 0.0225$ ,  $pFDR = 0.0901$ ).

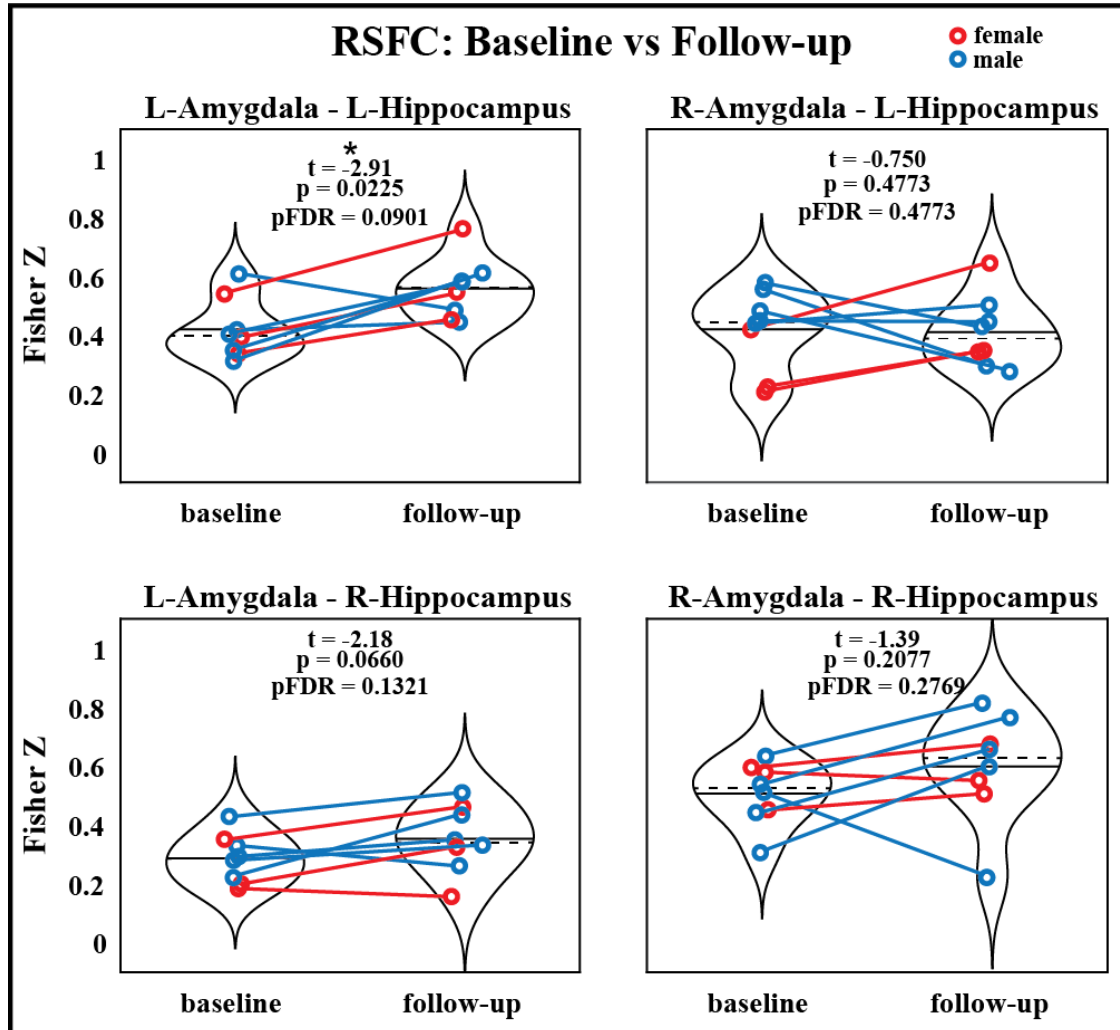

350

351 Figure 3: RSFC between the amygdala and hippocampus before and after MDMA-AT. P-values  
352 from a two-sided, paired t-test. Blue = male. Red = female. Black solid and dashed lines indicate  
353 group means and medians, respectively. (N = 8; t-statistics indicate baseline > follow-up; \*  
354 uncorrected p < 0.05).

355

356 Individual-level pre-to-post-therapy changes between the strength of these functional  
357 connections were then correlated (two-sided Pearson's) with changes in CAPS scores (SI Figure  
358 1). Only one of these correlations (right amygdala to left hippocampus FC versus CAPS) was  
359 significant before correction (N = 8; R = -0.820, uncorrected p = 0.0460, pFDR = 0.183).

360

361 **3.4 Brain activation during symptom provocation**

362 A script-driven autobiographical memory paradigm was used to assess brain activity during  
363 symptom provocation (Ruth A Lanius et al. 2002; Ruth A. Lanius et al. 2004; Mertens et al.  
364 2022). We compared whole-brain, script-driven activations (trauma > neutral) at baseline and  
365 follow-up (Figure 4). Before therapy (baseline), there tended to be larger magnitude activation in  
366 response to the trauma script versus the neutral script, as evidenced by the generally positive t-  
367 statistics (Figure 4A-D). After correction using threshold free cluster enhancement (TFCE), there  
368 was significantly greater activation during the trauma scripts compared to the neutral scripts in  
369 four separate areas (see Figure 4 caption for details of each). After therapy, there were smaller  
370 magnitude differences between brain activity in response to the two scripts, with no significant  
371 clusters (Figure 4E). Finally, we assessed the differences in the contrast before and after therapy  
372 (follow-up > baseline). There was generally greater contrast between the trauma and neutral  
373 scripts at baseline compared to at follow-up, with one cluster in the bilateral cuneus and lingual  
374 gyrus demonstrating significance after correction using TFCE (Figure 4F).

375

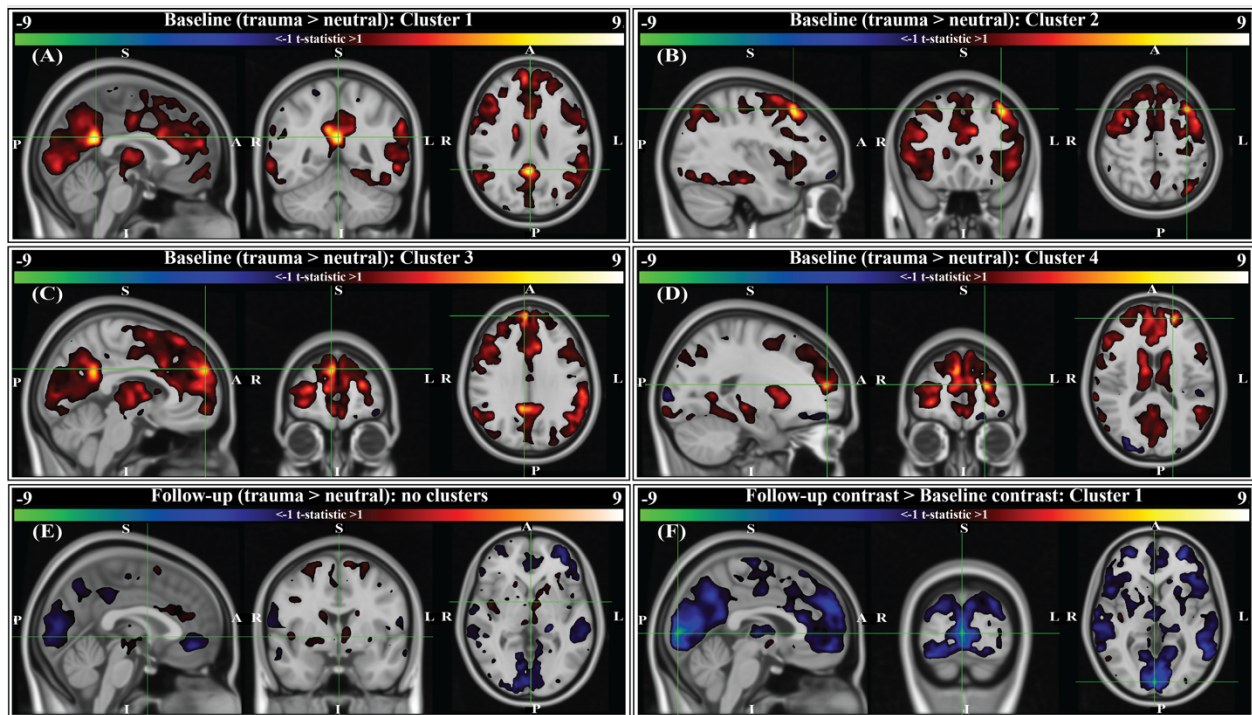

376

377 Figure 4: Group-level activation contrasts for trauma versus neutral script listening tasks (N = 9).

378 All panels show *t*-statistics for corresponding contrasts. Analyses were performed in 3 mm MNI

379 standard space, however results here are interpolated into 1 mm MNI standard space and clipped

380 to only show *t*-statistics greater than +/-1 for visualization purposes. Statistics reported below

381 (voxels, volume, *t*-statistic, corrected *p*-value) were calculated from original 3mm results. *P*-

382 values were corrected using threshold-free cluster enhancement (TFCE; see methods). For panels

383 A-E, positive *t*-statistics indicate greater activation to trauma scripts compared to neutral. For

384 panel F, sign indicates the direction of change in trauma>neutral contrast from baseline (i.e.

385 negative *t*-statistics indicate the contrast between trauma and neutral scripts was decreased at the

386 two-month follow-up compared to baseline). Crosshairs are located on the center of gravity

387 (c.o.g.) of significant clusters. (A) Cluster 1 for the baseline contrast is located primarily in the

388 right and left isthmus cingulate, with some overlap into the right and left precuneus (c.o.g.

389 MNI152 [0, -48, 24]; 6 voxels (162 mm<sup>3</sup>); c.o.g. *t* = 9.61, *p*(TFCE) = 0.0293). (B) Cluster 2 for

390 the baseline contrast is located in the left caudal middle-frontal gyrus (c.o.g. MNI152 [-36, 21,  
391 51]; 3 voxels (81 mm<sup>3</sup>); c.o.g.  $t = 9.01$ ,  $p(\text{TFCE}) = 0.0234$ ). (C) Cluster 3 for the baseline  
392 contrast is located in the right medial prefrontal cortex (c.o.g. MNI152 [6, 57, 30]; 2 voxels (54  
393 mm<sup>3</sup>); c.o.g.  $t = 7.41$ ,  $p(\text{TFCE}) = 0.0488$ ). (D) Cluster 4 for the baseline contrast is located in the  
394 left rostral middle frontal gyrus (c.o.g. MNI152 [-21 54 15]; 1 voxel (27 mm<sup>3</sup>); c.o.g.  $t = 9.45$ ,  
395  $p(\text{TFCE}) = 0.0312$ ). (E) There were no significant activation contrasts at the two-month follow-  
396 up (crosshairs shown at MNI152 [0, 0, 0]). (F) Comparing the group-level contrasts between  
397 time points (follow-up > baseline), there exists one significant cluster located primarily in the  
398 right and left cuneus, with some overlap into the right and left lingual gyrus (c.o.g. MNI152 [3, -  
399 90, 3]; 47 voxels (1,269 mm<sup>3</sup>); c.o.g.  $t = -9.31$ ,  $p(\text{TFCE}) = 0.0391$ ).

400

#### 401 **3.4 Baseline versus two-month follow-up changes in task FC**

402 We compared the pre- and post-therapy FC strength between 18 brain regions of interest (ROIs)  
403 during the task fMRI scans involving neutral and traumatic autobiographical audio recordings  
404 (Figure 5A). The ROIs are as follows: the right and left hippocampus head, hippocampus tail,  
405 amygdala, precuneus, caudal anterior cingulate cortex (ACC), rostral ACC, posterior cingulate  
406 cortex (PCC), isthmus cingulate, and the insula. Only one functional connection was  
407 significantly modified at follow-up compared to baseline: the right amygdala to left caudal ACC  
408 (N=9;  $t$ -statistic = 3.04,  $p = 0.0148$ ). This finding was no longer significant after corrections for  
409 multiple comparisons, however ( $p\text{FDR} = 0.9875$ ).

410

411 Individual-level pre-to-post therapy changes in these functional connections were then correlated  
412 (two-sided, Pearson's) with the individual-level reductions in CAPS-IV scores (Figure 5B). Most

413 correlations were positive, meaning that larger reductions in connectivity from pre- to post-  
414 therapy corresponded to larger improvements in PTSD symptoms. Four correlations between FC  
415 and CAPS-IV changes were significant following multiple comparisons correction: the left  
416 amygdala and left PCC (N=9; Pearson's R = 0.951, pFDR = 0.0462), the left amygdala and right  
417 PCC (N=9; Pearson's R = 0.972, pFDR = 0.0197), the left amygdala and left insula (N=9;  
418 Pearson's R = 0.977, pFDR = 0.0197), and the left isthmus cingulate and left hippocampal tail  
419 (N=9; Pearson's R = 0.947, pFDR = 0.0462) (Figure 5C).

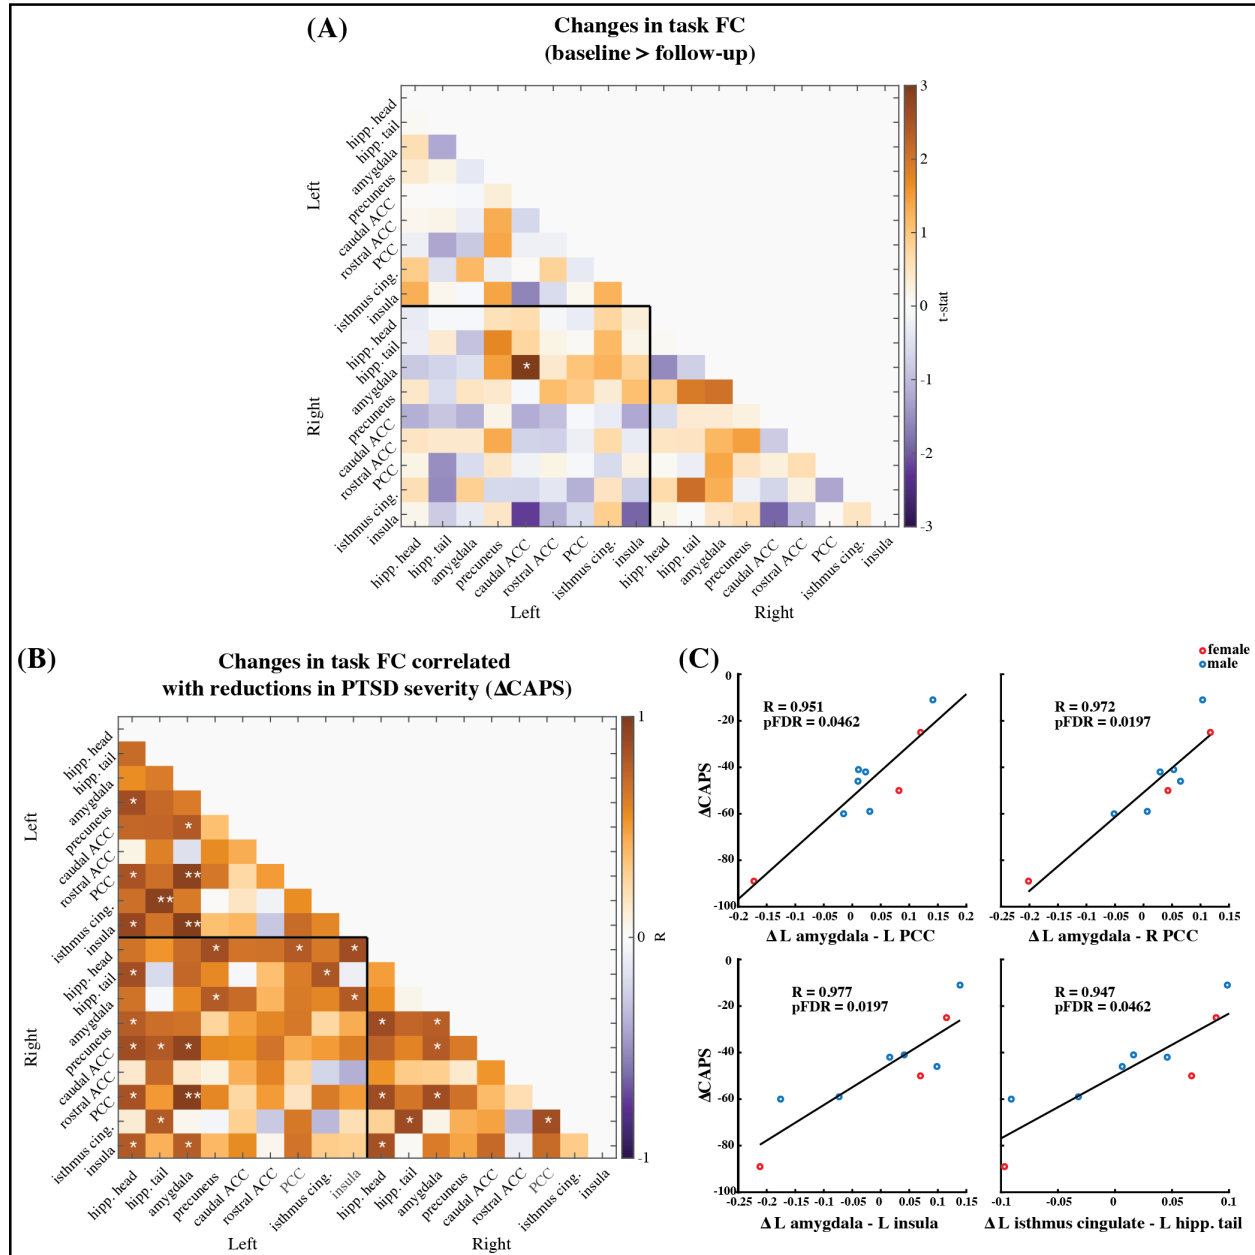

420

421 Figure 5: (A) Paired t-statistics shown for differences in functional connectivity between all  
 422 brain regions of interest during the task fMRI scan involving neutral and trauma memory audio  
 423 listening (N = 9; baseline > follow-up; \* two-sided uncorrected p < 0.05; \*\* pFDR < 0.05,  
 424 corrected). (B) Pearson correlation values between changes in ROI functional connectivity and  
 425 reduction in CAPS scores. Changes were calculated as follow-up values minus baseline values.  
 426 (N=9; \* uncorrected p < 0.05; \*\* pFDR < 0.05) Age and mean FD difference between baseline



427 and follow-up were included as covariates of non-interest. (C) Scatter plots of the three  
428 correlations that remained significant after corrections for multiple comparisons (i.e. pFDR <  
429 0.05). Red marker = female. Blue marker = male.

430

### 431 3.5 Supplemental analyses

432 Although not the primary focus of our analysis, we also repeated the previous correlations using  
433 other secondary outcome measures in place of CAPS-IV total severity scores. Namely, changes  
434 between baseline and follow-up in the BDI-II (depression symptoms), the PSQI (sleep quality),  
435 the PTGI (perceived growth following trauma), the DES-II (symptoms of dissociation), and the  
436 GAF (general psychological function) were used (SI Figure 2). Following correction for  
437 multiple comparisons, none of these correlations were significant.

438 We also replicated our *a priori* analyses of amygdala-hippocampal RSFC using head (anterior)  
439 and tail (posterior) sub-regions of the hippocampus (SI Figure 3). The left hippocampal head to  
440 left amygdala RSFC was increased at follow-up compared to baseline (N=8;  $t = -2.593$ ,  
441 uncorrected  $p = 0.0358$ ), as was the RSFC between the left hippocampal tail and right amygdala  
442 (N=8;  $t = -3.00$ , uncorrected  $p = 0.0199$ ). Neither of these effects were significant after  
443 corrections for multiple comparisons.

444 Lastly, we replicate our main functional connectivity analyses without the use of global signal  
445 regression and find that these results largely show the same trends, however there is less  
446 significance in some cases (SI Figures 4-6). The correlation between the left amygdala and left  
447 insula task functional connectivity change and CAPS reductions was significant in both with and  
448 without the use of global signal regression (SI Figure 6; N=9;  $R = 0.971$ , pFDR = 0.0229).

449

450 **DISCUSSION**

451 We report signatures of brain response during rest and audio listening task in eight veterans and  
452 one first-responder with clinically diagnosed chronic and severe PTSD before and two-months  
453 after MDMA-assisted therapy. We found a significant reduction in CAPS-IV total severity  
454 scores after therapy (Figure 2), indicating our sub-study participants mirrored the results from the  
455 parent study (Mithoefer et al. 2018). We found a trend suggesting that RSFC between the  
456 amygdala and hippocampus was strengthened post-therapy, particularly in the left hemisphere  
457 (Figure 3). Prior work suggests that modulation of amygdalae-hippocampal RSFC may be an  
458 important component of MDMA-AT for PTSD (Sripada et al. 2012; Ben-Zion, Keynan, et al.  
459 2020; Vaisvaser et al. 2013; Fan et al. 2015; Carhart-Harris et al. 2015; Lan et al. 2022), thus  
460 investigating this connection in future studies is warranted. We also found participants had  
461 increased activation in areas involved with self-referential processing and autobiographical  
462 memory while listening to traumatic versus neutral memory narrations pre-therapy (Figure 4A-  
463 D), and that no significant contrast existed after MDMA-AT (Figure 4E). Comparing trauma  
464 versus neutral contrasts between baseline and follow-up revealed a significant decrease in cuneus  
465 contrast after MDMA-AT (Figure 4F). Finally, the pre- to post-therapy reductions in FC during  
466 the script listening task between the left amygdala and right PCC, left PCC, and left insula, as  
467 well as FC between the left isthmus cingulate and left hippocampal tail strongly and significantly  
468 correlated with PTSD symptom improvement (Figure 5C). These results begin to shed light on  
469 the neurological mechanisms that may drive MDMA-AT for PTSD.

470

471 Previous work quantifying functional connectivity in PTSD and in stress exposure (Sripada et al.  
472 2012; Ben-Zion, Keynan, et al. 2020; Vaisvaser et al. 2013; Fan et al. 2015) and acute MDMA

473 administration in controls (Carhart-Harris et al. 2015) suggests one mechanism of MDMA-AT  
474 may be to increase pathologically lowered amygdala-hippocampal RSFC (Feduccia and  
475 Mithoefer 2018). The amygdala is associated with fear expression, threat recognition, and  
476 heightened response to emotional memories and is often dysregulated in patients with PTSD  
477 (LeDoux 2003; Pitman et al. 2012; Liberzon et al. 1999; Etkin and Wager 2007; Bremner et al.  
478 2005; Harnett, Goodman, and Knight 2020). The hippocampus also plays a central role in PTSD  
479 as it is thought to provide contextual information important for cognitive-affect during memory  
480 recollection (Harnett, Goodman, and Knight 2020; Pitman et al. 2012). Sripada and colleagues  
481 (2012) found combat veterans with PTSD had reduced amygdala-hippocampal RSFC compared  
482 to combat-exposed controls, leading them to speculate that this may relate to an inability to  
483 contextualize affective information in PTSD. Carhart-Harris and colleagues (2015) demonstrated  
484 that amygdala-hippocampal RSFC is increased acutely in MDMA administration compared to  
485 placebo and this increase occurred in a manner that correlated with the drug's subjective effects  
486 at a near-significant level, leading these researchers to propose that this functional connection  
487 was a primary target of MDMA-AT. Increased amygdala-hippocampal RSFC has also been  
488 linked to intranasal oxytocin administration after stress exposure (Fan et al. 2015) and this effect  
489 was mediated by serotonin signaling (Lan et al. 2022) – two neuromodulators that play a  
490 significant role in the pro-social and fear extinction effects of MDMA (Dumont et al. 2009; de la  
491 Torre et al. 2004; Feduccia and Duvauchelle 2008; Green et al. 2003; Thompson et al. 2007;  
492 Nardou et al. 2019; Young et al. 2017). Prior to our analysis (although after the study was  
493 designed and the data collected), we hypothesized that the RSFC between the amygdala and  
494 hippocampus would be higher after MDMA-AT compared to pre-therapy levels. Only the RSFC  
495 between the left amygdala and left hippocampus was significantly increased (Figure 3) however,

496 this finding no longer met thresholds for significance after multiple comparisons correction  
497 (pFDR = 0.09). We also found that the amount of increased right amygdala – left hippocampal  
498 RSFC after MDMA-AT positively correlated with PTSD symptom improvement at a near-  
499 significant level (SI Figure 1;  $R = -0.820$ , uncorrected  $p = 0.046$ , pFDR = 0.183). Our current  
500 findings, though inconclusive, are suggestive of a trend towards moderate increases in amygdala  
501 – hippocampal RSFC two-months after MDMA-AT. It is possible that more significant changes  
502 would have been observed with a larger sample size, longer resting-state scans, or imaging  
503 performed closer to MDMA administration. These findings justify the continued investigation of  
504 amygdala-hippocampal RSFC in the therapeutic mechanisms of MDMA-AT in future studies.

505

506 We next sought to study brain response during autobiographical memory listening to draw  
507 additional conclusions about MDMA-AT's effects in individuals with PTSD. Before therapy,  
508 participants had larger activation in four areas during an individualized trauma script listening  
509 task compared to neutral script listening: the right and left isthmus cingulate and precuneus, the  
510 left caudal middle frontal gyrus, the right medial prefrontal cortex, and the left rostral middle  
511 frontal gyrus (Figure 4A-D). These regions are broadly involved in self-processing operations  
512 (e.g. first-person perspective taking), episodic memory retrieval, visual-spatial imagery, auto-  
513 biographical memory recollection, and are included in or interact with the default mode network  
514 (Cavanna and Trimble 2006; Cauda et al. 2010; Spreng, Mar, and Kim 2009; Spreng and Grady  
515 2010; Kalenzaga et al. 2015; Demblon, Bahri, and D'Argembeau 2016; Raichle 2015). The  
516 retrosplenial cortex – located within the isthmus cingulate - is also found to be consistently  
517 activated by emotionally salient stimuli, and has been proposed to play a role in the interaction  
518 between emotion and memory (Maddock 1999). We conjecture that increased activation in these

519 regions during traumatic compared to neutral audio listening (Figure 4A-D) could be related to  
520 an increased intensity of the recollection or re-experiencing of traumatic memories compared to  
521 neutral ones for patients before therapy. At 2-month follow-up to MDMA-AT, there was no  
522 significant difference in the trauma vs neutral script activation (Figure 4E). The longitudinal  
523 comparison of these two time points indicated that the contrast between trauma and neutral was  
524 larger at baseline, particularly in a significant cluster in the right and left cuneus/lingual gyrus  
525 (Figure 4F). Cuneus activity during autobiographical memory tasks often coincides with activity  
526 in the frontal regions highlighted by the baseline contrast, and has been found to correlate with  
527 memory recall accuracy (Spreng and Grady 2010; Demblon, Bahri, and D'Argembeau 2016;  
528 Kalenzaga et al. 2015). Cuneus activity is thought to enhance the visual imagery of  
529 autobiographical memory recollection (Cabeza and St Jacques 2007), therefore decreased  
530 contrast in this area at follow-up suggests that intensity of visual imagery contrast between  
531 trauma and neutral memories may be decreased after MDMA-AT. Larger studies may allow  
532 more statistical power to identify additional longitudinal differences. Other longitudinal studies  
533 of individuals with PTSD have found that decreases in precuneus, isthmus cingulate, and middle  
534 frontal gyrus activation during symptom provocation is correlated with reductions in PTSD  
535 symptom severity (Garrett et al. 2019; Ke et al. 2016).

536  
537 PTSD is often associated with hyperactivity in the amygdala (Pitman et al. 2012); the acute  
538 administration of MDMA in healthy volunteers decreases blood flow to the amygdala during rest  
539 (Carhart-Harris et al. 2015) and attenuates its response to angry faces (Bedi et al. 2009). We had  
540 hypothesized that we would observe hyperactivity of the amygdala to trauma versus neutral  
541 scripts at baseline and that MDMA-AT would attenuate this response, however we observed

542 neither. It is important to note inconsistencies in the literature here. Amygdala hyperactivity in  
543 PTSD is not always observed, possibly due to differences in subtypes, sex, cultural  
544 representations, or choice of paradigm (van Huijstee and Vermetten 2018; R. A. Lanius et al.  
545 2001; Ruth A Lanius et al. 2002; Helpman et al. 2021; Chiao et al. 2008; Liddell and Jobson  
546 2016). Additionally, while MDMA did suppress amygdala activity during rest and in response to  
547 angry faces as previously mentioned, there was no observed impact on its response to  
548 autobiographical memories (Carhart-Harris et al. 2014). While activation-based analyses deserve  
549 continued attention in future studies to rectify these inconsistencies, functional connectivity is a  
550 complimentary approach we can use to extract additional information from fMRI.  
551  
552 Functional connectivity analyses in individuals with PTSD have revealed aberrant connectivity  
553 between several regions within default mode, limbic, and salience networks, and more broadly,  
554 regions involved in emotional and self-referential processing (Abdallah et al. 2017; Lazarov et al.  
555 2017; Malivoire et al. 2018; Brown et al. 2014; Gilboa et al. 2004; Fonzo et al. 2021; Rabinak et  
556 al. 2011; Belleau et al. 2020; Thome et al. 2020; Ruth A. Lanius et al. 2004; Sripada et al. 2012),  
557 and, further, the administration of MDMA in healthy volunteers has been shown to disrupt the  
558 functional integrity of these networks (Walpola et al. 2017; Carhart-Harris et al. 2015; Müller et  
559 al. 2021; Dipasquale et al. 2019; Avram et al. 2022). Here, we measured functional connectivity  
560 during script-driven autobiographical memory recall between the right and left hippocampus head,  
561 hippocampus tail, amygdala, precuneus, caudal ACC, rostral ACC, PCC, isthmus cingulate, and  
562 the insula. Our ROIs were defined and labeled based on the Desikan-Killiany (DK) brain atlas (SI  
563 Figures 7 and 8) (Desikan et al. 2006). We chose to segment the hippocampus into anterior (head)  
564 and posterior (tail) ROIs based on recent work showing that the two portions' FC are differentially

565 effected by PTSD (Malivoire et al. 2018). We assessed group-level changes in the strength of these  
566 functional connections and found no significant differences between baseline and follow-up after  
567 corrections for multiple comparisons (Figure 5A). However, we did find that greater recovery  
568 (larger decreases in CAPS-IV at follow-up) was associated with reductions in FC between the left  
569 amygdala and the right and left PCC, as well as the left insula (Figure 5C). The acute effects of  
570 MDMA in healthy volunteers has been shown to decrease the FC of the PCC (Müller et al. 2021;  
571 Dipasquale et al. 2019) and insula (Walpola et al. 2017), and alter amygdala and hippocampus FC  
572 (Carhart-Harris et al. 2015), highlighting the potential relevance of our current findings. Amygdala  
573 to posterior and mid-cingulate cortex FC has been shown to be associated with PTSD severity at  
574 different stages of disease progression, although differing patient populations and assessment time-  
575 lines lead to conflicting results (Belleau et al. 2020; R. A. Lanius et al. 2010; Bluhm et al. 2009;  
576 Cisler et al. 2016; Shou et al. 2017). One finding in healthy adults shows increased amygdala -  
577 PCC FC following the acute exposure to stress (Veer et al. 2011), thus the association between  
578 recovery and reduced amygdala – PCC task FC at follow-up possibly relates to reduced stress  
579 response to trauma memories (although the finding by Veer and colleagues is more posterior to  
580 the ROI used here). Amygdala and insula RSFC is increased in PTSD (Sripada et al. 2012; Rabinak  
581 et al. 2011) (except in one study which finds the opposite (Fonzo et al. 2021)), and reduced  
582 amygdala-insula FC during negative image reappraisal is associated with larger improvements in  
583 PTSD symptoms (Cisler et al. 2016). The strength of left amygdala-insula FC also positively  
584 correlates with the amount of acute anxiety measured in participants just before scanning (Baur et  
585 al. 2013). Attenuated functional connectivity of these two regions at follow-up in the present study  
586 possibly suggests a decreased intensity of recalled events, less ‘re-experiencing’, or reduced  
587 anxiety during the script-driven memory recall (Etkin and Wager 2007). Lastly, we found that

588 reductions in CAPS-IV at follow-up were associated with reduced FC between the left isthmus  
589 cingulate and left hippocampal tail (Figure 5C). The isthmus cingulate labeled here consists of the  
590 most posterior portions of the PCC (SI Figure 7). Increased FC between these two regions has  
591 previously been reported in PTSD patients compared to trauma-exposed health controls (Malivoire  
592 et al. 2018; Lazarov et al. 2017), and the present finding is possibly indicative of changes in  
593 memory contextualization and reduced threat sensitivity at two-month follow-up to MDMA-AT  
594 compared to baseline (Bluhm et al. 2009).

595

596 PTSD is characterized by decreased fear extinction in response to trauma-related stimuli. One  
597 possible mechanism through which MDMA-AT operates is enhanced reconsolidation and/or fear  
598 extinction processes (Feduccia and Mithoefer 2018). Several studies with MDMA implicate  
599 reconsolidation or fear extinction processes, and while it is currently unclear whether MDMA  
600 acts on only one or both, it is important to note that the two interact (Suzuki et al. 2004). Rodent  
601 models have demonstrated that the administration of MDMA prior to extinction learning  
602 enhances extinction retention (tested 48 hours after learning) and this effect is blocked by acute  
603 and chronic treatment with a serotonin transporter inhibitor (M. B. Young et al. 2015; 2017).  
604 Hake et al. (2019) found that MDMA administered during extinction learning phases did not  
605 enhance fear extinction memory, while MDMA administration during reconsolidation phases  
606 resulted in prolonged reductions in conditioned fear. In addition, MDMA administered prior to  
607 trauma-cue exposure (reconsolidation phase) in rodents resulted in reduced stress-related  
608 behavioral responses 7 days later (Arluk et al. 2022). Two recent trials in healthy humans found  
609 that MDMA (100 mg and 125 mg, respectively) administered prior to extinction learning  
610 resulted in improved extinction learning at extinction recall phases (48hr and 24hr later,



611 respectively) compared to the placebo group (Maples-Keller et al. 2022; Vizeli et al. 2022).  
612 Doss and colleagues (2018) found that 1 mg/kg of MDMA in healthy humans attenuated the  
613 encoding and retrieval of salient details from positive and negative stimuli (but not neutral  
614 stimuli), suggesting an ability for MDMA to alter emotional memory representation.  
615 Interestingly, a fMRI study in healthy humans found decreased activation in the precuneus/PCC  
616 during fear extinction learning (Ridderbusch et al. 2021), regions highlighted by our present  
617 study and others in PTSD (Garrett et al. 2019; Ke et al. 2016).

## 618 **LIMITATIONS**

619 The small sample size of the present study and the lack of a control population (e.g. trauma-  
620 exposed healthy controls) may decrease the generalizability of these findings. The trial design  
621 was placebo-controlled for dose-response (low, medium, and high), however, the follow-up  
622 scans used in this study were after the breaking of the blind and dose cross-over (low/medium to  
623 high) had occurred. For neuroimaging studies, comparisons with control populations are helpful  
624 for contextualizing longitudinal changes in brain response and provide information about  
625 whether changes in patient populations represent an abnormal response being restored to  
626 normality or a compensatory mechanism. In addition, multi-point imaging of healthy control or  
627 non-treatment (placebo) groups allow for the quantification of test-retest variability. Lastly, had  
628 we imaged a cohort that received therapy without MDMA, we would have been able to assess  
629 longitudinal brain changes that were unique to or enhanced by MDMA.

630

631 Here it must be discussed that PTSD is a disorder exhibiting at least two major sub-types  
632 (dissociative and non-dissociative) with characteristically opposing phenomenological and  
633 physiological responses to symptom provocation, which may explain inconsistencies in the

634 PTSD neurobiology literature (van Huijstee and Vermetten 2018). PTSD sub-type information  
635 was not collected in the present study. In addition to sub-type heterogeneity, males and females  
636 may also differ in their adaptive neural responses to trauma (Helpman et al. 2021). Limited by  
637 our sample size, we did not investigate differences between males and females in this study.

638

639 The accepted standard for assessing PTSD severity is the Clinician-Administered PTSD Scale  
640 (Blake et al. 1990). Specifically, CAPS-IV was used in this study. CAPS-IV involves an hour-  
641 long semi-structured interview with a clinician and, though comprehensive, faces limitations. In  
642 their baseline CAPS-IV assessment, and subsequently thereafter, patients were asked to refer to  
643 an index trauma that was measured throughout the study. This may present an issue in accurately  
644 assessing global PTSD severity if an adjacent or un-related trauma surfaces during therapy and  
645 becomes the prominent driver of their symptoms. These issues, combined with difficulty in  
646 blinding and expectancy effects, present additional challenges in accurately mapping fMRI  
647 metrics to clinical outcomes.

648

649 The task design used in this study examined differences in brain response to personalized audio  
650 scripts generated from narrations of traumatic and neutral memories. Many different stimuli have  
651 been used in fMRI studies of PTSD (R. A. Lanius et al. 2006; Sartory et al. 2013; Patel et al.  
652 2012), each providing its own unique advantages and disadvantages. Our present design  
653 optimizes personal relevance of the stimuli; however, this has the consequence of presenting  
654 each subject with a different set of stimuli, whereby brain responses within each block are not  
655 time-locked across participants. Also, it has previously been shown that PTSD survivors take  
656 longer to retrieve unrelated autobiographical information when listening to taped imagery scripts

657 of their traumatic memories (Kleim, Wallott, and Ehlers 2008). This suggests the possibility that  
658 those with the most severe PTSD will take the longest to cognitively transition to the neutral  
659 block from the trauma block. If this is true, then there would perhaps be an inverse-“U”  
660 relationship between PTSD severity and contrast between the trauma and neutral conditions, if  
661 the blocks are not spaced far enough apart to allow adequate time for patients to return to a  
662 baseline level of cognitive functioning. Additionally, because our repeated task fMRI scans were  
663 identical (rather than counterbalanced for condition), there could be primacy effects in the  
664 neutral condition (which was always first) and/or fatigue effects in the trauma condition (which  
665 was always last).

666

667 We did not aim to characterize lateralization in our findings, and though most of our significant  
668 FC results were found in the left amygdala, we did not test for statistical interaction effects  
669 between hemispheres. While lateralization of the amygdala remains debated, it has been  
670 suggested by early work that the left amygdala is more strongly related to conscious (versus  
671 unconscious) perception and emotional regulation (Morris, Öhman, and Dolan 1998).

672

673 Finally, the pre-specified aim of this study was to estimate longitudinal (baseline to 2-months  
674 after final MDMA session) changes in ROI response to traumatic audio scripts. Between the start  
675 of data collection and analysis, new literature emerged (Carhart-Harris et al. 2015; Lan et al.  
676 2022) implicating amygdala-hippocampus RSFC as a potential target of MDMA-AT, compelling  
677 us to expand our analysis beyond the pre-specified aims. Functional connectivity estimates from  
678 shorter scans (e.g. five minutes in the case of our resting-state data) can have lower reliability

679 (Birn et al. 2013) and therefore the trends in increased RSFC between amygdala and  
680 hippocampal regions reported here should be considered preliminary.

681

## 682 **CONCLUSION**

683 We report functional brain changes associated with MDMA-AT in veterans and first responders  
684 with moderate-to-severe and chronic PTSD. We had hypothesized that MDMA-AT may act  
685 through strengthening the RSFC between the amygdala and hippocampus, a connection which is  
686 weaker in PTSD populations (Sripada et al. 2012) and increased acutely by MDMA in healthy  
687 volunteers (Carhart-Harris et al. 2015). The trends found here are suggestive of such in the left  
688 amygdala – left hippocampus, however larger studies are needed. We also provide preliminary  
689 evidence that MDMA-AT alters brain response during symptom provocation in regions  
690 associated with fear response, anxiety, self-referential processing, and salient autobiographical  
691 memory, and are commonly found to be hyperactive in PTSD patients (Sartory et al. 2013; Patel  
692 et al. 2012). Finally, the reduction of several functional connections during autobiographical  
693 memory audio co-varied with symptom reduction in PTSD. Of these connections, the left  
694 amygdala – left insula is perhaps the most interesting, due to the role of amygdala-insular FC in  
695 anxiety and PTSD symptomatology (Baur et al. 2013; Cisler et al. 2016; Sripada et al. 2012;  
696 Rabinak et al. 2011). More research is necessary to confirm these results and to disentangle  
697 effects specific to MDMA and its combination with psychotherapy.

698

699 ----- **END OF MANUSCRIPT** -----

700

## REFERENCES

- Abdallah, C. G., K. M. Wrocklage, C. L. Averill, T. Akiki, B. Schweinsburg, A. Roy, B. Martini, S. M. Southwick, J. H. Krystal, and J. C. Scott. 2017. “Anterior Hippocampal Dysconnectivity in Posttraumatic Stress Disorder: A Dimensional and Multimodal Approach.” *Translational Psychiatry* 7 (2): e1045–e1045. <https://doi.org/10.1038/tp.2017.12>.
- Arluk, Shira, Michael A. Matar, Lior Carmi, Oded Arbel, Joseph Zohar, Doron Todder, and Hagit Cohen. 2022. “MDMA Treatment Paired with a Trauma-Cue Promotes Adaptive Stress Responses in a Translational Model of PTSD in Rats.” *Translational Psychiatry* 12 (1): 181. <https://doi.org/10.1038/s41398-022-01952-8>.
- Avram, Mihai, Felix Müller, Helena Rogg, Alexandra Korda, Christina Andreou, Friederike Holze, Patrick Vizeli, Laura Ley, Matthias E. Liechti, and Stefan Borgwardt. 2022. “Characterizing Thalamocortical (Dys)Connectivity Following D-Amphetamine, LSD, and MDMA Administration.” *Biological Psychiatry: Cognitive Neuroscience and Neuroimaging* 7 (9): 885–94. <https://doi.org/10.1016/j.bpsc.2022.04.003>.
- Baur, Volker, Jürgen Hänggi, Nicolas Langer, and Lutz Jäncke. 2013. “Resting-State Functional and Structural Connectivity within an Insula-Amygdala Route Specifically Index State and Trait Anxiety.” *Biological Psychiatry* 73 (1): 85–92. <https://doi.org/10.1016/j.biopsych.2012.06.003>.
- Bedi, Gillinder, K. Luan Phan, Mike Angstadt, and Harriet de Wit. 2009. “Effects of MDMA on Sociability and Neural Response to Social Threat and Social Reward.” *Psychopharmacology* 207 (1): 73–83. <https://doi.org/10.1007/s00213-009-1635-z>.
- Belleau, Emily L., Lauren E. Ehret, Jessica L. Hanson, Karen J. Brasel, Christine L. Larson, and Terri A. deRoon-Cassini. 2020. “Amygdala Functional Connectivity in the Acute Aftermath of Trauma Prospectively Predicts Severity of Posttraumatic Stress Symptoms.” *Neurobiology of Stress* 12 (May): 100217. <https://doi.org/10.1016/j.ynstr.2020.100217>.
- Benjamini, Yoav, and Yocef Hochberg. 1995. “Controlling the False Discovery Rate: A Practical and Powerful Approach to Multiple Testing.” *Journal of the Royal Statistical Society. Series B (Methodological)* 57 (1): 289–300.
- Ben-Zion, Ziv, Nimrod Jakob Keynan, Roe Admon, Haggai Sharon, Pinchas Halpern, Israel Liberzon, Arie Shalev, and Talma Henlder. 2020. “Hippocampal-Amygdala Resting State Functional Connectivity Serves as Resilience Factor for Short- and Long-Term Stress Exposure.” *Biological Psychiatry*, 75 Annual Scientific Convention and Meeting, 87 (9, Supplement): S88–89. <https://doi.org/10.1016/j.biopsych.2020.02.248>.
- Ben-Zion, Ziv, Yoav Zeevi, Nimrod Jakob Keynan, Roe Admon, Tal Kozlovski, Haggai Sharon, Pinchas Halpern, et al. 2020. “Multi-Domain Potential Biomarkers for Post-Traumatic Stress Disorder (PTSD) Severity in Recent Trauma Survivors.” *Translational Psychiatry* 10 (1): 208. <https://doi.org/10.1038/s41398-020-00898-z>.
- Birn, Rasmus M., Erin K. Molloy, Rémi Patriat, Taurean Parker, Timothy B. Meier, Gregory R. Kirk, Veena A. Nair, M. Elizabeth Meyerand, and Vivek Prabhakaran. 2013. “The Effect of Scan Length on the Reliability of Resting-State fMRI Connectivity Estimates.” *NeuroImage* 83 (December): 550–58. <https://doi.org/10.1016/j.neuroimage.2013.05.099>.
- Blake, Dudley, Frank Weathers, LN Nagy, D. Kaloupek, G. Klauminzer, Dennis Charney, and Terence Keane. 1990. “A Clinician Rating Scale for Assessing Current and Lifetime PTSD: The CAPS-1.” *Behav. Ther.* 18 (January).

- Bluhm, Robyn L, Peter C Williamson, Elizabeth A Osuch, Paul A Frewen, Todd K Stevens, Kristine Boksman, Richard W J Neufeld, Jean Théberge, and Ruth A Lanius. 2009. “Alterations in Default Network Connectivity in Posttraumatic Stress Disorder Related to Early-Life Trauma.” *Journal of Psychiatry & Neuroscience : JPN* 34 (3): 187–94.
- Bremner, J. Douglas, Eric Vermetten, Christian Schmahl, Viola Vaccarino, Meena Vythilingam, Nadeem Afzal, Christian Grillon, and Dennis S. Charney. 2005. “Positron Emission Tomographic Imaging of Neural Correlates of a Fear Acquisition and Extinction Paradigm in Women with Childhood Sexual-Abuse-Related Post-Traumatic Stress Disorder.” *Psychological Medicine* 35 (6): 791–806. <https://doi.org/10.1017/S0033291704003290>.
- Brown, Vanessa M, Kevin S LaBar, Courtney C Haswell, Andrea L Gold, Gregory McCarthy, and Rajendra A Morey. 2014. “Altered Resting-State Functional Connectivity of Basolateral and Centromedial Amygdala Complexes in Posttraumatic Stress Disorder.” *Neuropsychopharmacology* 39 (2): 351–59. <https://doi.org/10.1038/npp.2013.197>.
- Cabeza, Roberto, and Peggy St Jacques. 2007. “Functional Neuroimaging of Autobiographical Memory.” *Trends in Cognitive Sciences* 11 (5): 219–27. <https://doi.org/10.1016/j.tics.2007.02.005>.
- Carhart-Harris, Murphy K, Leech R, Erritzoe D, Wall MB, Ferguson B, Williams LT, et al. 2015. “The Effects of Acutely Administered 3,4-Methylenedioxymethamphetamine on Spontaneous Brain Function in Healthy Volunteers Measured With Arterial Spin Labeling and Blood Oxygen Level-Dependent Resting State Functional Connectivity.” *Biological Psychiatry* 78 (8). <https://doi.org/10.1016/J.BIOPSYCH.2013.12.015>.
- Carhart-Harris, R L, M B Wall, D Erritzoe, M Kaelen, B Ferguson, I De Meer, M Tanner, et al. 2014. “The Effect of Acutely Administered MDMA on Subjective and BOLD-fMRI Responses to Favourite and Worst Autobiographical Memories.” *The International Journal of Neuropsychopharmacology* 17 (4): 527–40. <https://doi.org/10.1017/S1461145713001405>.
- Cauda, Franco, Giuliano Geminiani, Federico D’Agata, Katiuscia Sacco, Sergio Duca, Andrew P. Bagshaw, and Andrea E. Cavanna. 2010. “Functional Connectivity of the Posteromedial Cortex.” *PLoS ONE* 5 (9): e13107. <https://doi.org/10.1371/journal.pone.0013107>.
- Cavanna, Andrea E., and Michael R. Trimble. 2006. “The Precuneus: A Review of Its Functional Anatomy and Behavioural Correlates.” *Brain: A Journal of Neurology* 129 (Pt 3): 564–83. <https://doi.org/10.1093/brain/awl004>.
- Chiao, Joan Y., Tetsuya Iidaka, Heather L. Gordon, Junpei Nogawa, Moshe Bar, Elissa Aminoff, Norihiro Sadato, and Nalini Ambady. 2008. “Cultural Specificity in Amygdala Response to Fear Faces.” *Journal of Cognitive Neuroscience* 20 (12): 2167–74. <https://doi.org/10.1162/jocn.2008.20151>.
- Cisler, J. M., B. A. Sigel, J. S. Steele, S. Smitherman, K. Vanderzee, J. Pemberton, T. L. Kramer, and C. D. Kilts. 2016. “Changes in Functional Connectivity of the Amygdala during Cognitive Reappraisal Predict Symptom Reduction during Trauma-Focused Cognitive-Behavioral Therapy among Adolescent Girls with Post-Traumatic Stress Disorder.” *Psychological Medicine* 46 (14): 3013–23. <https://doi.org/10.1017/S0033291716001847>.
- Curry, Daniel W., Matthew B. Young, Andrew N. Tran, Georges E. Daoud, and Leonard L. Howell. 2018. “Separating the Agony from Ecstasy: R(-)-3,4-Methylenedioxymethamphetamine Has Prosocial and Therapeutic-like Effects without

- Signs of Neurotoxicity in Mice.” *Neuropharmacology* 128 (January): 196–206.  
<https://doi.org/10.1016/j.neuropharm.2017.10.003>.
- Dale, A. M., B. Fischl, and M. I. Sereno. 1999. “Cortical Surface-Based Analysis. I. Segmentation and Surface Reconstruction.” *NeuroImage* 9 (2): 179–94.  
<https://doi.org/10.1006/nimg.1998.0395>.
- Davidson, J. R. T. 2000. “Trauma: The Impact of Post-Traumatic Stress Disorder.” *Journal of Psychopharmacology* 14 (2\_suppl1): S5–12.  
<https://doi.org/10.1177/02698811000142S102>.
- Demblon, Julie, Mohamed Ali Bahri, and Arnaud D’Argembeau. 2016. “Neural Correlates of Event Clusters in Past and Future Thoughts: How the Brain Integrates Specific Episodes with Autobiographical Knowledge.” *NeuroImage* 127 (February): 257–66.  
<https://doi.org/10.1016/j.neuroimage.2015.11.062>.
- Desikan, Rahul S., Florent Ségonne, Bruce Fischl, Brian T. Quinn, Bradford C. Dickerson, Deborah Blacker, Randy L. Buckner, et al. 2006. “An Automated Labeling System for Subdividing the Human Cerebral Cortex on MRI Scans into Gyral Based Regions of Interest.” *NeuroImage* 31 (3): 968–80. <https://doi.org/10.1016/j.neuroimage.2006.01.021>.
- Dipasquale, Ottavia, Pierluigi Selvaggi, Mattia Veronese, Anthony S. Gabay, Federico Turkheimer, and Mitul A. Mehta. 2019. “Receptor-Enriched Analysis of Functional Connectivity by Targets (REACT): A Novel, Multimodal Analytical Approach Informed by PET to Study the Pharmacodynamic Response of the Brain under MDMA.” *NeuroImage* 195 (July): 252–60. <https://doi.org/10.1016/j.neuroimage.2019.04.007>.
- Doss, Manoj K., Jessica Weafer, David A. Gallo, and Harriet de Wit. 2018. “MDMA Impairs Both the Encoding and Retrieval of Emotional Recollections.” *Neuropsychopharmacology* 43 (4): 791–800. <https://doi.org/10.1038/npp.2017.171>.
- Dumont, G. J. H., F. C. G. J. Sweep, R. van der Steen, R. Hermsen, A. R. T. Donders, D. J. Touw, J. M. A. van Gerven, J. K. Buitelaar, and R. J. Verkes. 2009. “Increased Oxytocin Concentrations and Prosocial Feelings in Humans after Ecstasy (3,4-Methylenedioxymethamphetamine) Administration.” *Social Neuroscience* 4 (4): 359–66.  
<https://doi.org/10.1080/17470910802649470>.
- Ehlers, Anke. 2010. “Understanding and Treating Unwanted Trauma Memories in Posttraumatic Stress Disorder.” *Zeitschrift Für Psychologie / Journal of Psychology* 218 (2): 141–45.  
<https://doi.org/10.1027/0044-3409/a000021>.
- Etkin, Amit, and Tor D. Wager. 2007. “Functional Neuroimaging of Anxiety: A Meta-Analysis of Emotional Processing in PTSD, Social Anxiety Disorder, and Specific Phobia.” *American Journal of Psychiatry* 164 (10): 1476–88.  
<https://doi.org/10.1176/appi.ajp.2007.07030504>.
- Fan, Yan, Karin Pestke, Melanie Feeser, Sabine Aust, Jens C. Pruessner, Heinz Böker, Malek Bajbouj, and Simone Grimm. 2015. “Amygdala–Hippocampal Connectivity Changes During Acute Psychosocial Stress: Joint Effect of Early Life Stress and Oxytocin.” *Neuropsychopharmacology* 40 (12): 2736–44. <https://doi.org/10.1038/npp.2015.123>.
- Feduccia, Allison A., and Christine L. Duvauchelle. 2008. “Auditory Stimuli Enhance MDMA-Conditioned Reward and MDMA-Induced Nucleus Accumbens Dopamine, Serotonin and Locomotor Responses.” *Brain Research Bulletin* 77 (4): 189–96.  
<https://doi.org/10.1016/j.brainresbull.2008.07.007>.
- Feduccia, Allison A., and Michael C. Mithoefer. 2018. “MDMA-Assisted Psychotherapy for PTSD: Are Memory Reconsolidation and Fear Extinction Underlying Mechanisms?”

- Progress in Neuro-Psychopharmacology and Biological Psychiatry* 84 (June): 221–28.  
<https://doi.org/10.1016/J.PNPBP.2018.03.003>.
- Feduccia, Allison A., Michael C. Mithoefer, Lisa Jerome, Julie Holland, Amy Emerson, and Rick Doblin. 2018. “Response to the Consensus Statement of the PTSD Psychopharmacology Working Group.” *Biological Psychiatry* 84 (2): e21–22.  
<https://doi.org/10.1016/j.biopsych.2017.11.023>.
- Fonzo, Gregory A., Madeleine S. Goodkind, Desmond J. Oathes, Yevgeniya V. Zaiko, Meredith Harvey, Kathy K. Peng, M. Elizabeth Weiss, et al. 2021. “Amygdala and Insula Connectivity Changes Following Psychotherapy for Posttraumatic Stress Disorder: A Randomized Clinical Trial.” *Biological Psychiatry* 89 (9): 857–67.  
<https://doi.org/10.1016/j.biopsych.2020.11.021>.
- Friston, Karl J., Steven Williams, Robert Howard, Richard S. J. Frackowiak, and Robert Turner. 1996. “Movement-Related Effects in FMRI Time-Series.” *Magnetic Resonance in Medicine* 35 (3): 346–55. <https://doi.org/10.1002/mrm.1910350312>.
- Garrett, Amy, Judith A. Cohen, Sanno Zack, Victor Carrion, Booil Jo, Joseph Blader, Alexis Rodriguez, Thomas J. Vanasse, Allan L. Reiss, and W. Stewart Agras. 2019. “Longitudinal Changes in Brain Function Associated with Symptom Improvement in Youth with PTSD.” *Journal of Psychiatric Research* 114 (July): 161–69.  
<https://doi.org/10.1016/j.jpsychires.2019.04.021>.
- Gilboa, Asaf, Arieh Y Shalev, Lucian Laor, Hava Lester, Yoram Louzoun, Roland Chisin, and Omer Bonne. 2004. “Functional Connectivity of the Prefrontal Cortex and the Amygdala in Posttraumatic Stress Disorder.” *Biological Psychiatry* 55 (3): 263–72.  
<https://doi.org/10.1016/j.biopsych.2003.08.004>.
- Glover, Gary H. 2011. “Overview of Functional Magnetic Resonance Imaging.” *Neurosurgery Clinics of North America, Functional Imaging*, 22 (2): 133–39.  
<https://doi.org/10.1016/j.nec.2010.11.001>.
- Goetter, Elizabeth M., Eric Bui, Rebecca A. Ojserkis, Rebecca J. Zakarian, Rebecca Weintraub Brendel, and Naomi M. Simon. 2015. “A Systematic Review of Dropout From Psychotherapy for Posttraumatic Stress Disorder Among Iraq and Afghanistan Combat Veterans.” *Journal of Traumatic Stress* 28 (5): 401–9. <https://doi.org/10.1002/jts.22038>.
- Gradus, Jaimie L. 2017. “Prevalence and Prognosis of Stress Disorders: A Review of the Epidemiologic Literature.” *Clinical Epidemiology* 9 (May): 251–60.  
<https://doi.org/10.2147/CLEP.S106250>.
- Green, A. Richard, Annis O. Mechan, J. Martin Elliott, Esther O’Shea, and M. Isabel Colado. 2003. “The Pharmacology and Clinical Pharmacology of 3,4-Methylenedioxymethamphetamine (MDMA, ‘Ecstasy’).” *Pharmacological Reviews* 55 (3): 463–508. <https://doi.org/10.1124/pr.55.3.3>.
- Hake, Holly S., Jazmyne K. P. Davis, River R. Wood, Margaret K. Tanner, Esteban C. Loetz, Anais Sanchez, Mykola Ostrovskyy, et al. 2019. “3,4-Methylenedioxymethamphetamine (MDMA) Impairs the Extinction and Reconsolidation of Fear Memory in Rats.” *Physiology & Behavior* 199 (February): 343–50.  
<https://doi.org/10.1016/j.physbeh.2018.12.007>.
- Harnett, Nathaniel G., Adam M. Goodman, and David C. Knight. 2020. “PTSD-Related Neuroimaging Abnormalities in Brain Function, Structure, and Biochemistry.” *Experimental Neurology* 330 (August): 113331.  
<https://doi.org/10.1016/j.expneurol.2020.113331>.



- Helpman, Liat, Xi Zhu, Sigal Zilcha-Mano, Benjamin Suarez-Jimenez, Amit Lazarov, Bret Rutherford, and Yuval Neria. 2021. “Reversed Patterns of Resting State Functional Connectivity for Females vs. Males in Posttraumatic Stress Disorder.” *Neurobiology of Stress*, September, 100389. <https://doi.org/10.1016/J.YNSTR.2021.100389>.
- Hoge, Charles W., Carl A. Castro, Stephen C. Messer, Dennis McGurk, Dave I. Cotting, and Robert L. Koffman. 2004. “Combat Duty in Iraq and Afghanistan, Mental Health Problems, and Barriers to Care.” *The New England Journal of Medicine* 351 (1): 13–22. <https://doi.org/10.1056/NEJMoa040603>.
- Huijstee, Jytte van, and Eric Vermetten. 2018. “The Dissociative Subtype of Post-Traumatic Stress Disorder: Research Update on Clinical and Neurobiological Features.” *Current Topics in Behavioral Neurosciences* 38: 229–48. [https://doi.org/10.1007/7854\\_2017\\_33](https://doi.org/10.1007/7854_2017_33).
- Iglesias, Juan Eugenio, Jean C. Augustinack, Khoa Nguyen, Christopher M. Player, Allison Player, Michelle Wright, Nicole Roy, et al. 2015. “A Computational Atlas of the Hippocampal Formation Using Ex Vivo, Ultra-High Resolution MRI: Application to Adaptive Segmentation of in Vivo MRI.” *NeuroImage* 115 (July): 117–37. <https://doi.org/10.1016/j.neuroimage.2015.04.042>.
- Javidi, H., and M. Yadollahie. 2012. “Post-Traumatic Stress Disorder.” *The International Journal of Occupational and Environmental Medicine* 3 (1): 2–9.
- Jerome, Lisa, Allison A. Feduccia, Julie B. Wang, Scott Hamilton, Berra Yazar-Klosinski, Amy Emerson, Michael C. Mithoefer, and Rick Doblin. 2020. “Long-Term Follow-up Outcomes of MDMA-Assisted Psychotherapy for Treatment of PTSD: A Longitudinal Pooled Analysis of Six Phase 2 Trials.” *Psychopharmacology* 237 (8): 2485–97. <https://doi.org/10.1007/s00213-020-05548-2>.
- Kalenzaga, Sandrine, Marco Sperduti, Adèle Anssens, Penelope Martinelli, Anne-Dominique Devauchelle, Thierry Gallarda, Marion Delhommeau, et al. 2015. “Episodic Memory and Self-Reference via Semantic Autobiographical Memory: Insights from an fMRI Study in Younger and Older Adults.” *Frontiers in Behavioral Neuroscience* 8. <https://www.frontiersin.org/articles/10.3389/fnbeh.2014.00449>.
- Ke, Jun, Li Zhang, Rongfeng Qi, Weihui Li, Cailan Hou, Yuan Zhong, Zhong He, Lingjiang Li, and Guangming Lu. 2016. “A Longitudinal fMRI Investigation in Acute Post-Traumatic Stress Disorder (PTSD).” *Acta Radiologica* 57 (11): 1387–95. <https://doi.org/10.1177/0284185115585848>.
- Kleim, Birgit, Franziska Wallott, and Anke Ehlers. 2008. “Are Trauma Memories Disjointed from Other Autobiographical Memories in Posttraumatic Stress Disorder? An Experimental Investigation.” *Behavioural and Cognitive Psychotherapy* 36 (2): 221–34. <https://doi.org/10.1017/S1352465807004080>.
- Lan, Chunmei, Congcong Liu, Keshuang Li, Zhiying Zhao, Jiabin Yang, Yina Ma, Dirk Scheele, Shuxia Yao, Keith M. Kendrick, and Benjamin Becker. 2022. “Oxytocinergic Modulation of Stress-Associated Amygdala-Hippocampus Pathways in Humans Is Mediated by Serotonergic Mechanisms.” *The International Journal of Neuropsychopharmacology* 25 (10): 807–17. <https://doi.org/10.1093/ijnp/pyac037>.
- Lanius, R. A., R. L. Bluhm, N. J. Coupland, K. M. Hegadoren, B. Rowe, J. Théberge, R. W. J. Neufeld, P. C. Williamson, and M. Brimson. 2010. “Default Mode Network Connectivity as a Predictor of Post-Traumatic Stress Disorder Symptom Severity in Acutely Traumatized Subjects.” *Acta Psychiatrica Scandinavica* 121 (1): 33–40. <https://doi.org/10.1111/j.1600-0447.2009.01391.x>.

- Lanius, R. A., R. Bluhm, U. Lanius, and C. Pain. 2006. "A Review of Neuroimaging Studies in PTSD: Heterogeneity of Response to Symptom Provocation." *Journal of Psychiatric Research* 40 (8): 709–29. <https://doi.org/10.1016/j.jpsychires.2005.07.007>.
- Lanius, R. A., P. C. Williamson, M. Densmore, K. Boksman, M. A. Gupta, R. W. Neufeld, J. S. Gati, and R. S. Menon. 2001. "Neural Correlates of Traumatic Memories in Posttraumatic Stress Disorder: A Functional MRI Investigation." *The American Journal of Psychiatry* 158 (11): 1920–22. <https://doi.org/10.1176/appi.ajp.158.11.1920>.
- Lanius, Ruth A, Peter C Williamson, Kristine Boksman, Maria Densmore, Madhulika Gupta, Richard W.J Neufeld, Joseph S Gati, and Ravi S Menon. 2002. "Brain Activation during Script-Driven Imagery Induced Dissociative Responses in PTSD: A Functional Magnetic Resonance Imaging Investigation." *Biological Psychiatry* 52 (4): 305–11. [https://doi.org/10.1016/S0006-3223\(02\)01367-7](https://doi.org/10.1016/S0006-3223(02)01367-7).
- Lanius, Ruth A., Peter C. Williamson, Maria Densmore, Kristine Boksman, R. W. Neufeld, Joseph S. Gati, and Ravi S. Menon. 2004. "The Nature of Traumatic Memories: A 4-T FMRI Functional Connectivity Analysis." *American Journal of Psychiatry* 161 (1): 36–44. <https://doi.org/10.1176/appi.ajp.161.1.36>.
- Lazarov, Amit, Xi Zhu, Benjamin Suarez-Jimenez, Bret R. Rutherford, and Yuval Neria. 2017. "Resting-State Functional Connectivity of Anterior and Posterior Hippocampus in Posttraumatic Stress Disorder." *Journal of Psychiatric Research* 94 (November): 15–22. <https://doi.org/10.1016/j.jpsychires.2017.06.003>.
- LeDoux, Joseph. 2003. "The Emotional Brain, Fear, and the Amygdala." *Cellular and Molecular Neurobiology* 23 (4): 727–38. <https://doi.org/10.1023/A:1025048802629>.
- Lewis, Catrin, Neil P. Roberts, Samuel Gibson, and Jonathan I. Bisson. 2020. "Dropout from Psychological Therapies for Post-Traumatic Stress Disorder (PTSD) in Adults: Systematic Review and Meta-Analysis." *European Journal of Psychotraumatology* 11 (1): 1709709. <https://doi.org/10.1080/20008198.2019.1709709>.
- Liberzon, Israel, Stephan F. Taylor, Richard Amdur, Tara D. Jung, Kenneth R. Chamberlain, Satoshi Minoshima, Robert A. Koeppe, and Lorraine M. Fig. 1999. "Brain Activation in PTSD in Response to Trauma-Related Stimuli." *Biological Psychiatry* 45 (7): 817–26. [https://doi.org/10.1016/S0006-3223\(98\)00246-7](https://doi.org/10.1016/S0006-3223(98)00246-7).
- Liddell, Belinda J., and Laura Jobson. 2016. "The Impact of Cultural Differences in Self-Representation on the Neural Substrates of Posttraumatic Stress Disorder." *European Journal of Psychotraumatology* 7 (1): 30464. <https://doi.org/10.3402/ejpt.v7.30464>.
- Lucassen, Paul J., Jens Pruessner, Nuno Sousa, Osborne F. X. Almeida, Anne Marie Van Dam, Grazyna Rajkowska, Dick F. Swaab, and Boldizsár Czéh. 2014. "Neuropathology of Stress." *Acta Neuropathologica* 127 (1): 109–35. <https://doi.org/10.1007/s00401-013-1223-5>.
- Maddock, Richard J. 1999. "The Retrosplenial Cortex and Emotion: New Insights from Functional Neuroimaging of the Human Brain." *Trends in Neurosciences* 22 (7): 310–16. [https://doi.org/10.1016/S0166-2236\(98\)01374-5](https://doi.org/10.1016/S0166-2236(98)01374-5).
- Malivoire, Bailee L., Todd A. Girard, Ronak Patel, and Candice M. Monson. 2018. "Functional Connectivity of Hippocampal Subregions in PTSD: Relations with Symptoms." *BMC Psychiatry* 18 (1): 129. <https://doi.org/10.1186/s12888-018-1716-9>.
- Maples-Keller, Jessica L, Seth D Norrholm, Mark Burton, Collin Reiff, Callan Coghlan, Tanja Jovanovic, Carly Yasinski, et al. 2022. "A Randomized Controlled Trial of 3,4-Methylenedioxymethamphetamine (MDMA) and Fear Extinction Retention in Healthy

- Adults.” *Journal of Psychopharmacology (Oxford, England)* 36 (3): 368–77.  
<https://doi.org/10.1177/026988112111069124>.
- Mei, Willem F. van der, Anna C. Barbano, Andrew Ratanatharathorn, Richard A. Bryant, Douglas L. Delahanty, Terri A. deRoos-Cassini, Betty S. Lai, et al. 2020. “Evaluating a Screener to Quantify PTSD Risk Using Emergency Care Information: A Proof of Concept Study.” *BMC Emergency Medicine* 20 (March): 16.  
<https://doi.org/10.1186/s12873-020-00308-z>.
- Mertens, Yoki L., Antje Manthey, Anika Sierk, Henrik Walter, and Judith K. Daniels. 2022. “Neural Correlates of Acute Post-Traumatic Dissociation: A Functional Neuroimaging Script-Driven Imagery Study.” *BJPsych Open* 8 (4): e109.  
<https://doi.org/10.1192/bjo.2022.65>.
- Mitchell, Jennifer M., Michael Bogenschutz, Alia Lilienstein, Charlotte Harrison, Sarah Kleiman, Kelly Parker-Guilbert, Marcela Ot’alora G., et al. 2021. “MDMA-Assisted Therapy for Severe PTSD: A Randomized, Double-Blind, Placebo-Controlled Phase 3 Study.” *Nature Medicine* 27 (6): 1025–33. <https://doi.org/10.1038/s41591-021-01336-3>.
- Mithoefer, Michael C., Allison A. Feduccia, Lisa Jerome, Anne Mithoefer, Mark Wagner, Zach Walsh, Scott Hamilton, Berra Yazar-Klosinski, Amy Emerson, and Rick Doblin. 2019. “MDMA-Assisted Psychotherapy for Treatment of PTSD: Study Design and Rationale for Phase 3 Trials Based on Pooled Analysis of Six Phase 2 Randomized Controlled Trials.” *Psychopharmacology* 236 (9): 2735–45. <https://doi.org/10.1007/s00213-019-05249-5>.
- Mithoefer, Michael C., Ann T. Mithoefer, Allison A. Feduccia, Lisa Jerome, Mark Wagner, Joy Wymer, Julie Holland, et al. 2018. “3,4-Methylenedioxymethamphetamine (MDMA)-Assisted Psychotherapy for Post-Traumatic Stress Disorder in Military Veterans, Firefighters, and Police Officers: A Randomised, Double-Blind, Dose-Response, Phase 2 Clinical Trial.” *The Lancet Psychiatry* 5 (6): 486–97. [https://doi.org/10.1016/S2215-0366\(18\)30135-4](https://doi.org/10.1016/S2215-0366(18)30135-4).
- Mithoefer, Michael C., Mark T. Wagner, Ann T. Mithoefer, Lisa Jerome, and Rick Doblin. 2011. “The Safety and Efficacy of {+/-}3,4-Methylenedioxymethamphetamine-Assisted Psychotherapy in Subjects with Chronic, Treatment-Resistant Posttraumatic Stress Disorder: The First Randomized Controlled Pilot Study.” *Journal of Psychopharmacology (Oxford, England)* 25 (4): 439–52.  
<https://doi.org/10.1177/0269881110378371>.
- Morris, J. S., A. Öhman, and R. J. Dolan. 1998. “Conscious and Unconscious Emotional Learning in the Human Amygdala.” *Nature* 393 (6684): 467–70.  
<https://doi.org/10.1038/30976>.
- Mott, Juliette M., Sasha Mondragon, Natalie E. Hundt, Melissa Beason-Smith, Rebecca H. Grady, and Ellen J. Teng. 2014. “Characteristics of U.S. Veterans Who Begin and Complete Prolonged Exposure and Cognitive Processing Therapy for PTSD.” *Journal of Traumatic Stress* 27 (3): 265–73. <https://doi.org/10.1002/jts.21927>.
- Müller, Felix, Friederike Holze, Patrick Dolder, Laura Ley, Patrick Vizeli, Alain Soltermann, Matthias E. Liechti, and Stefan Borgwardt. 2021. “MDMA-Induced Changes in within-Network Connectivity Contradict the Specificity of These Alterations for the Effects of Serotonergic Hallucinogens.” *Neuropsychopharmacology* 46 (3): 545–53.  
<https://doi.org/10.1038/s41386-020-00906-2>.

- Nardou, Romain, Eastman M. Lewis, Rebecca Rothhaas, Ran Xu, Aimei Yang, Edward Boyden, and Gül Dölen. 2019. "Oxytocin-Dependent Reopening of a Social Reward Learning Critical Period with MDMA." *Nature* 569 (7754): 116–20. <https://doi.org/10.1038/s41586-019-1075-9>.
- Patel, Ronak, R. Nathan Spreng, Lisa M. Shin, and Todd A. Girard. 2012. "Neurocircuitry Models of Posttraumatic Stress Disorder and beyond: A Meta-Analysis of Functional Neuroimaging Studies." *Neuroscience & Biobehavioral Reviews* 36 (9): 2130–42. <https://doi.org/10.1016/j.neubiorev.2012.06.003>.
- Pitman, Roger K., Ann M. Rasmusson, Karestan C. Koenen, Lisa M. Shin, Scott P. Orr, Mark W. Gilbertson, Mohammed R. Milad, and Israel Liberzon. 2012. "Biological Studies of Post-Traumatic Stress Disorder." *Nature Reviews Neuroscience* 13 (11): 769–87. <https://doi.org/10.1038/nrn3339>.
- Power, Jonathan D., Kelly A. Barnes, Abraham Z. Snyder, Bradley L. Schlaggar, and Steven E. Petersen. 2012. "Spurious but Systematic Correlations in Functional Connectivity MRI Networks Arise from Subject Motion." *NeuroImage* 59 (3): 2142–54. <https://doi.org/10.1016/j.neuroimage.2011.10.018>.
- Rabinak, Christine, Mike Angstadt, Robert Welsh, Amy Kennedy, Mark Lyubkin, Brian Martis, and K. Luan Phan. 2011. "Altered Amygdala Resting-State Functional Connectivity in Post-Traumatic Stress Disorder." *Frontiers in Psychiatry* 2. <https://www.frontiersin.org/articles/10.3389/fpsy.2011.00062>.
- Raichle, Marcus E. 2015. "The Brain's Default Mode Network." *Annual Review of Neuroscience* 38 (1): 433–47. <https://doi.org/10.1146/annurev-neuro-071013-014030>.
- Ridderbusch, Isabelle C., Adrian Wroblewski, Yunbo Yang, Jan Richter, Maike Hollandt, Alfons O. Hamm, Hans-Ulrich Wittchen, et al. 2021. "Neural Adaptation of Cingulate and Insular Activity during Delayed Fear Extinction: A Replicable Pattern across Assessment Sites and Repeated Measurements." *NeuroImage* 237 (August): 118157. <https://doi.org/10.1016/j.neuroimage.2021.118157>.
- Sartory, Gudrun, Jan Cwik, Helge Knuppertz, Benjamin Schürholt, Morena Lebens, Rüdiger J. Seitz, and Ralf Schulze. 2013. "In Search of the Trauma Memory: A Meta-Analysis of Functional Neuroimaging Studies of Symptom Provocation in Posttraumatic Stress Disorder (PTSD)." *PloS One* 8 (3): e58150. <https://doi.org/10.1371/journal.pone.0058150>.
- Sestieri, Carlo, Maurizio Corbetta, Gian Luca Romani, and Gordon L. Shulman. 2011. "Episodic Memory Retrieval, Parietal Cortex, and the Default Mode Network: Functional and Topographic Analyses." *The Journal of Neuroscience: The Official Journal of the Society for Neuroscience* 31 (12): 4407–20. <https://doi.org/10.1523/JNEUROSCI.3335-10.2011>.
- Shalev, Arieh Y., Martin Gevonden, Andrew Ratanatharathorn, Eugene Laska, Willem F. van der Mei, Wei Qi, Sarah Lowe, et al. 2019. "Estimating the Risk of PTSD in Recent Trauma Survivors: Results of the International Consortium to Predict PTSD (ICPP)." *World Psychiatry: Official Journal of the World Psychiatric Association (WPA)* 18 (1): 77–87. <https://doi.org/10.1002/wps.20608>.
- Shou, Haochang, Zhen Yang, Theodore D. Satterthwaite, Philip A Cook, Steven E. Bruce, Russell T. Shinohara, Benjamin Rosenberg, and Yvette I. Sheline. 2017. "Cognitive Behavioral Therapy Increases Amygdala Connectivity with the Cognitive Control Network in Both MDD and PTSD." *NeuroImage: Clinical* 14 (January): 464–70. <https://doi.org/10.1016/J.NICL.2017.01.030>.

- Smith, Stephen M., Mark Jenkinson, Mark W. Woolrich, Christian F. Beckmann, Timothy E. J. Behrens, Heidi Johansen-Berg, Peter R. Bannister, et al. 2004. "Advances in Functional and Structural MR Image Analysis and Implementation as FSL." *NeuroImage* 23 Suppl 1: S208-219. <https://doi.org/10.1016/j.neuroimage.2004.07.051>.
- Smith, Stephen M., and Thomas E. Nichols. 2009. "Threshold-Free Cluster Enhancement: Addressing Problems of Smoothing, Threshold Dependence and Localisation in Cluster Inference." *NeuroImage* 44 (1): 83–98. <https://doi.org/10.1016/j.neuroimage.2008.03.061>.
- Spreng, R. Nathan, and Cheryl L. Grady. 2010. "Patterns of Brain Activity Supporting Autobiographical Memory, Propection, and Theory of Mind, and Their Relationship to the Default Mode Network." *Journal of Cognitive Neuroscience* 22 (6): 1112–23. <https://doi.org/10.1162/jocn.2009.21282>.
- Spreng, R. Nathan, Raymond A. Mar, and Alice S. N. Kim. 2009. "The Common Neural Basis of Autobiographical Memory, Propection, Navigation, Theory of Mind, and the Default Mode: A Quantitative Meta-Analysis." *Journal of Cognitive Neuroscience* 21 (3): 489–510. <https://doi.org/10.1162/jocn.2008.21029>.
- Sripada, Rebecca K., Anthony P. King, Sarah N. Garfinkel, Xin Wang, Chandra S. Sripada, Robert C. Welsh, and Israel Liberzon. 2012. "Altered Resting-State Amygdala Functional Connectivity in Men with Posttraumatic Stress Disorder." *Journal of Psychiatry & Neuroscience : JPN* 37 (4): 241. <https://doi.org/10.1503/JPN.110069>.
- Steenkamp, Maria M., Brett T. Litz, Charles W. Hoge, and Charles R. Marmar. 2015. "Psychotherapy for Military-Related PTSD: A Review of Randomized Clinical Trials." *JAMA* 314 (5): 489–500. <https://doi.org/10.1001/jama.2015.8370>.
- Suzuki, Akinobu, Sheena A. Josselyn, Paul W. Frankland, Shoichi Masushige, Alcino J. Silva, and Satoshi Kida. 2004. "Memory Reconsolidation and Extinction Have Distinct Temporal and Biochemical Signatures." *Journal of Neuroscience* 24 (20): 4787–95. <https://doi.org/10.1523/JNEUROSCI.5491-03.2004>.
- Svoboda, Eva, Margaret C. McKinnon, and Brian Levine. 2006. "The Functional Neuroanatomy of Autobiographical Memory: A Meta-Analysis." *Neuropsychologia* 44 (12): 2189–2208. <https://doi.org/10.1016/j.neuropsychologia.2006.05.023>.
- Thome, Janine, Braeden A. Terpou, Margaret C. McKinnon, and Ruth A. Lanius. 2020. "The Neural Correlates of Trauma-Related Autobiographical Memory in Posttraumatic Stress Disorder: A Meta-Analysis." *Depression and Anxiety* 37 (4): 321–45. <https://doi.org/10.1002/da.22977>.
- Thompson, M. R., P. D. Callaghan, G. E. Hunt, J. L. Cornish, and I. S. McGregor. 2007. "A Role for Oxytocin and 5-HT1A Receptors in the Prosocial Effects of 3,4-Methylenedioxymethamphetamine ('Ecstasy')." *Neuroscience* 146 (2): 509–14. <https://doi.org/10.1016/j.neuroscience.2007.02.032>.
- Torre, Rafael de la, Magí Farré, Pere N. Roset, Neus Pizarro, Sergio Abanades, Mireia Segura, Jordi Segura, and Jordi Camí. 2004. "Human Pharmacology of MDMA: Pharmacokinetics, Metabolism, and Disposition." *Therapeutic Drug Monitoring* 26 (2): 137–44.
- Vaisvaser, Sharon, Tamar Lin, Roe Admon, Ilana Podlipsky, Yona Greenman, Naftali Stern, Eyal Fruchter, et al. 2013. "Neural Traces of Stress: Cortisol Related Sustained Enhancement of Amygdala-Hippocampal Functional Connectivity." *Frontiers in Human Neuroscience* 7 (July): 313. <https://doi.org/10.3389/fnhum.2013.00313>.

- VanElzakker, Michael B., Lindsay K. Staples-Bradley, and Lisa M. Shin. 2018. “The Neurocircuitry of Fear and PTSD.” In *Sleep and Combat-Related Post Traumatic Stress Disorder*, edited by Eric Vermetten, Anne Germain, and Thomas C. Neylan, 111–25. New York, NY: Springer. [https://doi.org/10.1007/978-1-4939-7148-0\\_10](https://doi.org/10.1007/978-1-4939-7148-0_10).
- Veer, Ilya M., Nicole Y. L. Oei, Philip Spinhoven, Mark A. van Buchem, Bernet M. Elzinga, and Serge A. R. B. Rombouts. 2011. “Beyond Acute Social Stress: Increased Functional Connectivity between Amygdala and Cortical Midline Structures.” *NeuroImage* 57 (4): 1534–41. <https://doi.org/10.1016/j.neuroimage.2011.05.074>.
- Vizeli, Patrick, Isabelle Straumann, Urs Duthaler, Nimmy Varghese, Anne Eckert, Martin P. Paulus, Victoria Risbrough, and Matthias E. Liechti. 2022. “Effects of 3,4-Methylenedioxymethamphetamine on Conditioned Fear Extinction and Retention in a Crossover Study in Healthy Subjects.” *Frontiers in Pharmacology* 13 (July): 906639. <https://doi.org/10.3389/fphar.2022.906639>.
- Walpoli, Ishan C, Timothy Nest, Leor Roseman, David Erritzoe, Amanda Feilding, David J Nutt, and Robin L Carhart-Harris. 2017. “Altered Insula Connectivity under MDMA.” *Neuropsychopharmacology* 42 (11): 2152–62. <https://doi.org/10.1038/npp.2017.35>.
- Wang, Julie B., Jessica Lin, Leah Bedrosian, Allison Coker, Ilsa Jerome, Allison Feduccia, Alia Lilienstein, et al. 2021. “Scaling Up: Multisite Open-Label Clinical Trials of MDMA-Assisted Therapy for Severe Posttraumatic Stress Disorder.” *Journal of Humanistic Psychology*, June, 00221678211023663. <https://doi.org/10.1177/00221678211023663>.
- Whitfield-Gabrieli, Susan, and Alfonso Nieto-Castanon. 2012. “Conn: A Functional Connectivity Toolbox for Correlated and Anticorrelated Brain Networks.” *Brain Connectivity* 2 (3): 125–41. <https://doi.org/10.1089/brain.2012.0073>.
- Winkler, Anderson M., Gerard R. Ridgway, Matthew A. Webster, Stephen M. Smith, and Thomas E. Nichols. 2014. “Permutation Inference for the General Linear Model.” *NeuroImage* 92 (May): 381–97. <https://doi.org/10.1016/j.neuroimage.2014.01.060>.
- Woodward, Neil D., and Carissa J. Cascio. 2015. “Resting-State Functional Connectivity in Psychiatric Disorders.” *JAMA Psychiatry* 72 (8): 743–44. <https://doi.org/10.1001/jamapsychiatry.2015.0484>.
- Woolrich, Mark W., Timothy E. J. Behrens, Christian F. Beckmann, Mark Jenkinson, and Stephen M. Smith. 2004. “Multilevel Linear Modelling for fMRI Group Analysis Using Bayesian Inference.” *NeuroImage* 21 (4): 1732–47. <https://doi.org/10.1016/j.neuroimage.2003.12.023>.
- Young, M. B., R. Andero, K. J. Ressler, and L. L. Howell. 2015. “3,4-Methylenedioxymethamphetamine Facilitates Fear Extinction Learning.” *Translational Psychiatry* 5 (9): e634–e634. <https://doi.org/10.1038/tp.2015.138>.
- Young, M. B., Seth D. Norrholm, Lara M. Khoury, Tanja Jovanovic, Sheila A.M. Rauch, Collin M. Reiff, Boadie W. Dunlop, Barbara O. Rothbaum, and Leonard L. Howell. 2017. “Inhibition of Serotonin Transporters Disrupts the Enhancement of Fear Memory Extinction by 3,4-Methylenedioxymethamphetamine (MDMA).” *Psychopharmacology* 234 (19): 2883–95. <https://doi.org/10.1007/s00213-017-4684-8>.
- Zhou, Juan, Siwei Liu, Kwun Kei Ng, and Juan Wang. 2017. “Applications of Resting-State Functional Connectivity to Neurodegenerative Disease.” *Neuroimaging Clinics* 27 (4): 663–83. <https://doi.org/10.1016/j.nic.2017.06.007>.
